# Supplementary material
Source: PubMed Central journal article supplement (PMC4195786)
Supplement: embj0033-1912-sd1.pdf [file embj0033-1912-sd1.pdf]

# Supplemental Information

## Supplemental Figures

### Figure S1

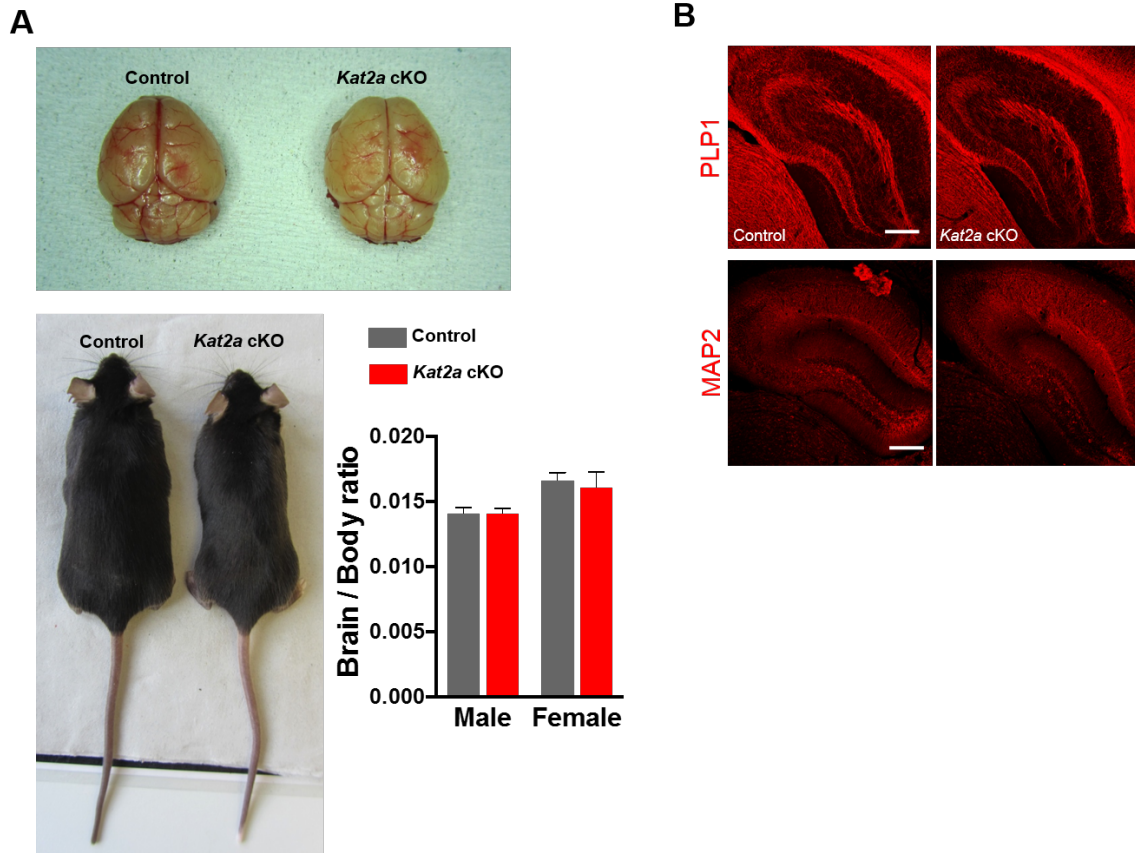

**Figure S1. Loss of KAT2A does not alter gross brain morphology.** **A.** *Upper panel:* Representative images of non-fixed brains (olfactory bulbs removed) of male control and *Kat2a* cKO mice. *Lower left panel:* Representative images of male mice from both groups. *Lower right panel:* Quantification of brain weight over body weight ratio. There was no difference between control (n=21) and *Kat2a* cKO (n=16) animals. In both groups, males (n=14 vs. 12) showed lower ratios compared to females (n=7 vs. 4). **B.** Representative images showing hippocampal immunoreactivity for oligodendrocyte marker PLP1 and post-synaptic marker MAP2 in control and *Kat2a* cKO mice (n=4/group) Scale bar:150  $\mu$ m. Error bar represent S.E.M.

Figure S2

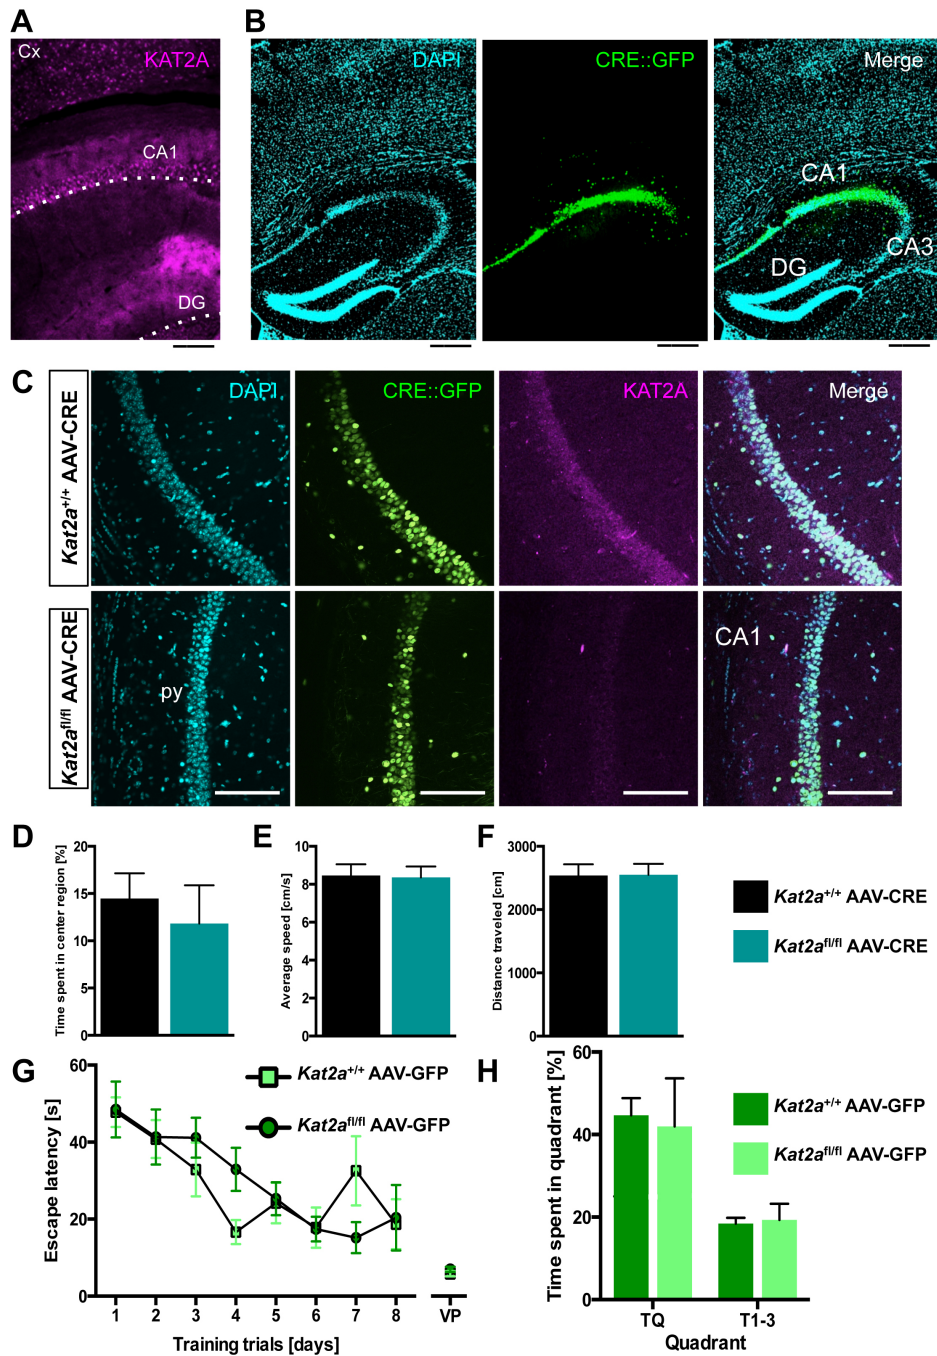

**Fig. S2. KAT2A in the CA1 region does not affect basal anxiety, motor function and short-term plasticity.**

**A.** Representative immunostaining showing KAT2A expression in the cortex (Cx) as well as in CA1 and DG. Scale bar 150  $\mu$ m. **B.** Representative micrographs showing expression of Cre::GFP fusion protein after AAV injection. Detectable expression was limited to CA1. Scale bar: 250  $\mu$ m. **C.** Representative immunostainings showing the reduction of KAT2A in the hippocampal CA1 pyramidal (py) layer of *Kat2a<sup>fl/fl</sup>* AAV-CRE mice compared to wild type controls (*Kat2a<sup>+/+</sup>* AAV-CRE). Scale bar: 250  $\mu$ m. **D-F.** Open field test for *Kat2a<sup>fl/fl</sup>* AAV-CRE mice compared to controls. No differences were found for the tested parameters 'Time spent in center region' (**D**), 'Average speed' (**E**), and 'Distance traveled' (**F**). **G-H.** AAV-GFP was injected in the CA1 of *Kat2a<sup>fl/fl</sup>* and wild type controls (*Kat2a<sup>+/+</sup>*) and mice were subjected to the Morris water maze (n=5/group). There was neither a difference during the acquisition phase (**G**), nor during probe test (**H**). VP: visual platform.

Figure S3

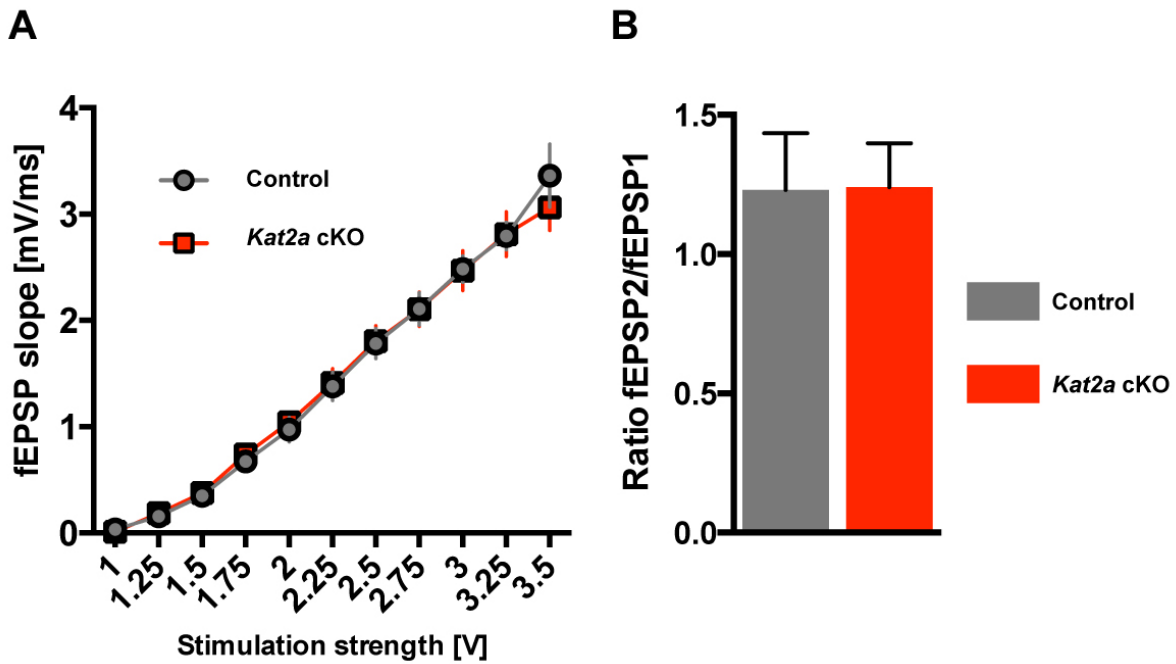

**Fig. S3. CA1 specific plasticity controlled by KAT2A.**

A. To establish input-output relationships for hippocampal CA3-CA1 synapses the slopes of fEPSPs were plotted against the stimulation protocol. Basal synaptic transmission was normal in *Kat2a* cKO and control mice (n= 5/group). B. Paired pulse facilitation tested in *Kat2a* cKO and control mice (n=5/group). The ratios of second over first fEPSP slopes were plotted. There was no significant difference among groups. Error bar represent S.E.M.

Figure S4

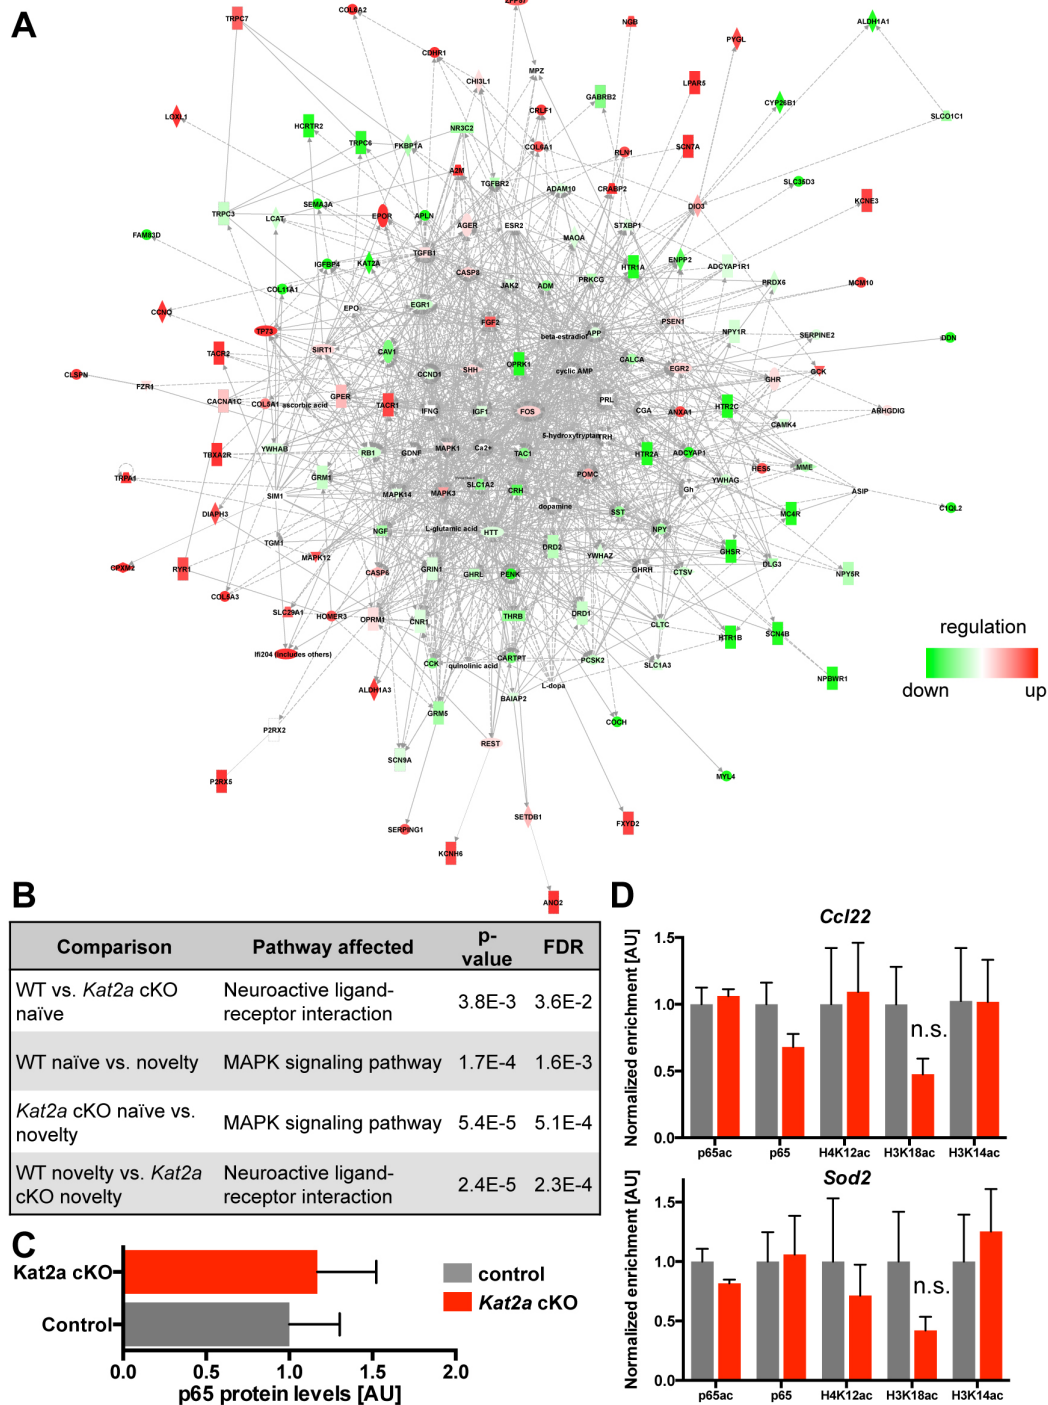

**Fig. S4. CA1 specific gene-expression network controlled by KAT2A.**

**A.** Network analysis of differentially regulated genes between control and *Kat2a* cKO mice in the CA1 region. For network analysis we used all genes differentially expresses amongst *Kat2a* cKO and control mice under naïve or novelty induced conditions. **B.** Major pathways affected by KAT2A. Please note that the major pathway affected by novelty was MAPK signaling, which was independent of KAT2A function. **C.** Relative protein levels as determined by western blot for p65 (n=4/group). There was no difference between groups. **D.** ChIP at promoters known NF- $\kappa$ B-target genes (*Ccl22* and *Sod2*), which were not regulated in *Kat2a* cKO mice. Primers were designed to amplify the predicted NF- $\kappa$ B binding site. There was no significant difference between groups.

Figure S5

A

Normalized sequence count ratio  
CA1 vs. Hippocampus

+8 log<sub>2</sub> scale -8

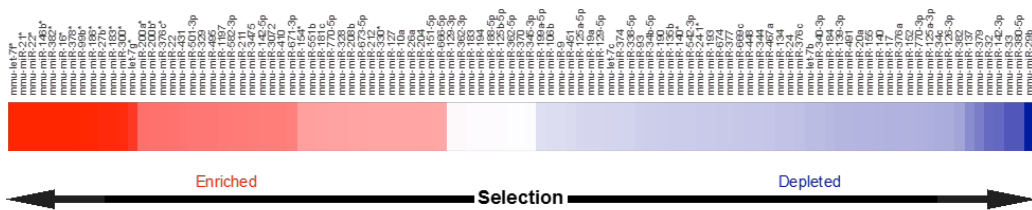

B

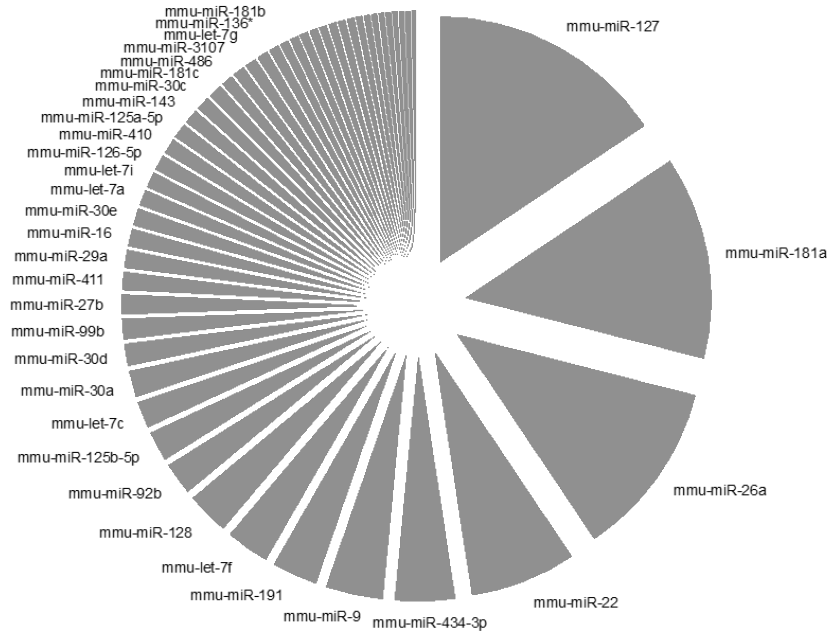

C

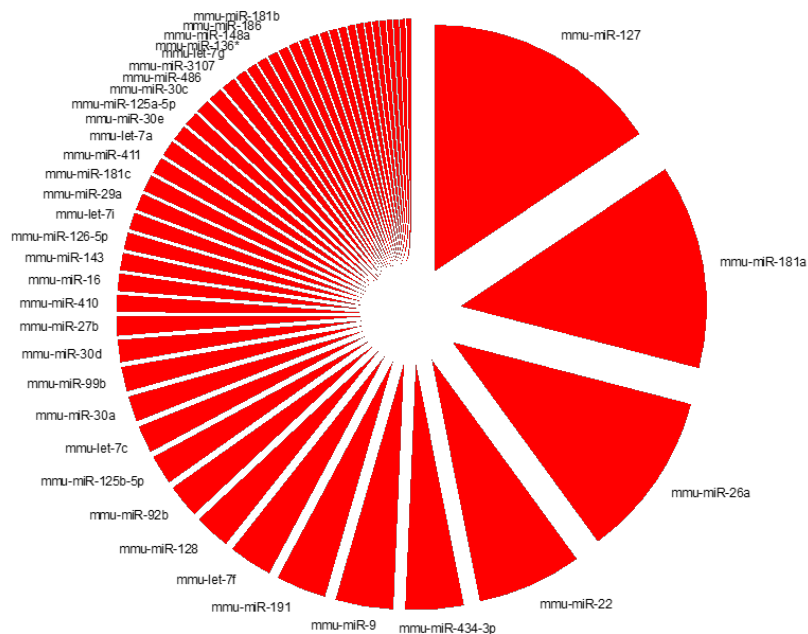

**Figure S5. KAT2A does not regulate the CA1 microRNAome.** **A.** Comparison of the miRNome of the whole hippocampus with the CA1-specific miRNome reported in this paper. **B-C.** Comparison of microRNA expression levels did not reveal any significant differences. Average distribution of normalized read counts of the Top50 microRNAs was similar between control (**C**) and *Kat2a* cKO (**C**) mice (n=6/group). For the full list and Top50 comparison see Table\_S5.

Fig S6.

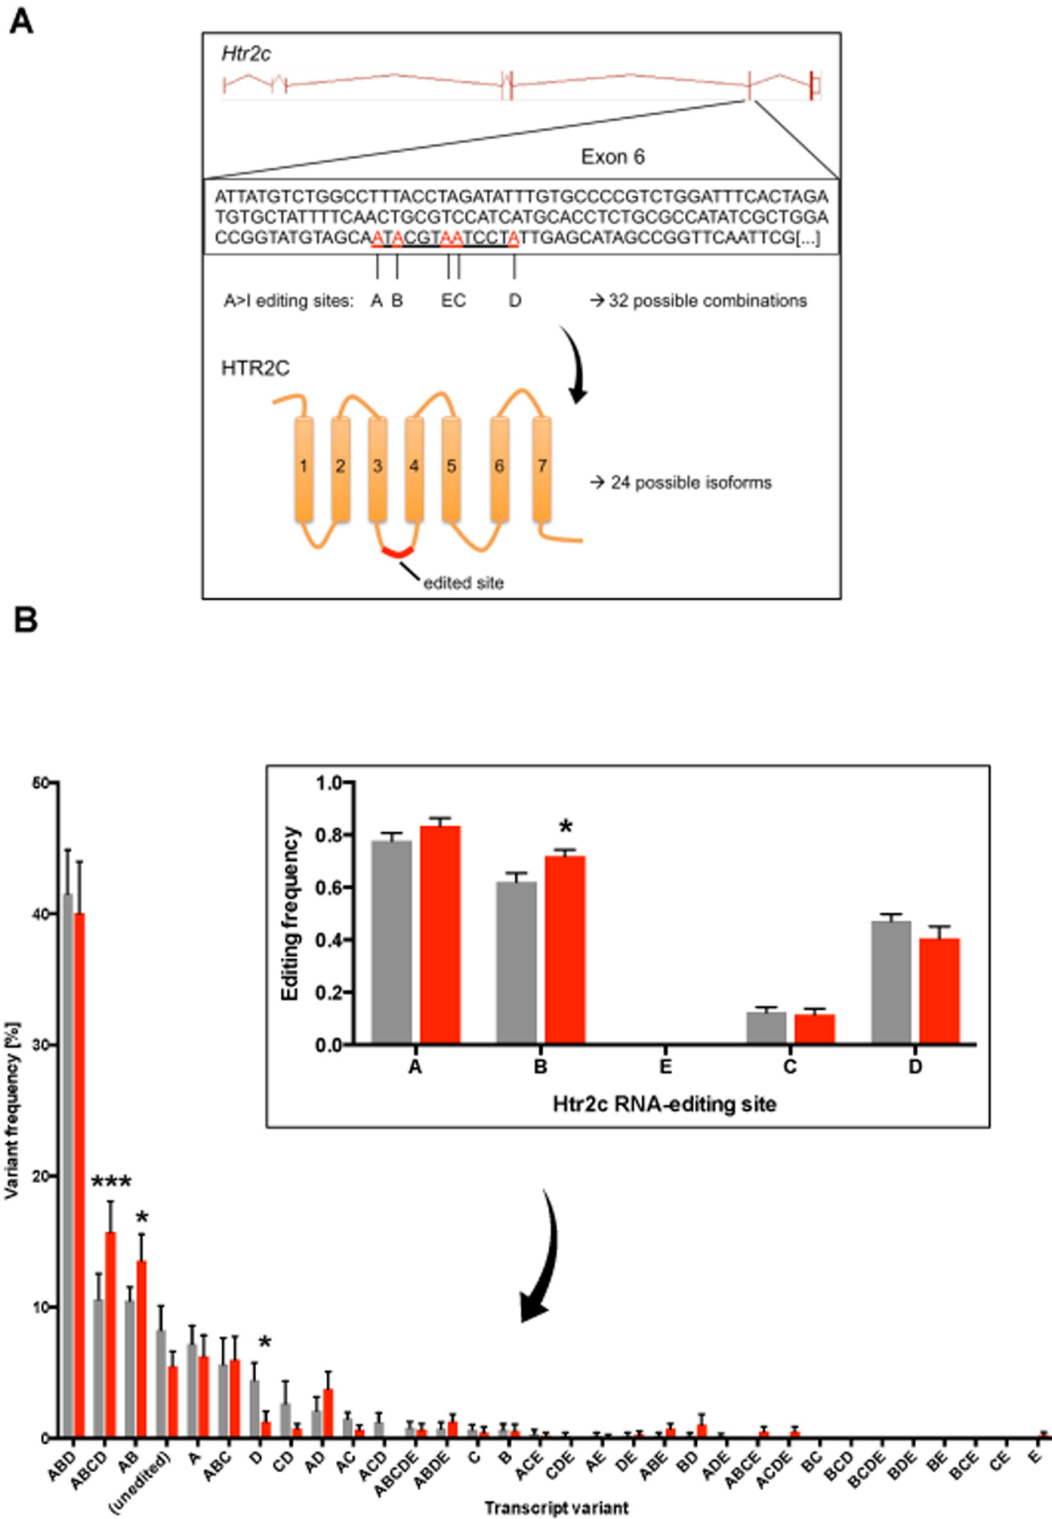

**Fig. S6. Htr2c mRNA-editing is altered in *Kat2a* cKO mice**

It is likely, that multiple KAT2a-dependent processes contribute to a phenotype that is a complex as memory formation. To address this issue – at least in part – we asked if *Kat2a* may be involved in other types of post-transcriptional or co-transcriptional modifications. In addition to the analysis of the transcriptome and the microRNAome we were able to employ our dataset to investigate RNA-editing at known sites.

**A.** The serotonin receptor HTR2C is known to be subject to well defined RNA-editing, a process in which adenosine bases in the transcribed mRNA are deaminated to inosine bases (A>I

modification) (Burns et al, 1997). As editing is occurring in the protein coding region (exon 6) of the *Htr2c* mRNA it leads to altered protein function (Burns et al, 1997). The image shows an overview of the mRNA-editing processing and edited sites in the *Htr2c* mRNA.

**B.** Using our RNA-seq dataset, we thus investigated the known modification to see whether RNA-editing of *Htr2c* mRNA is altered by loss of *Kat2a*. Using as similar read coverage over the exon 6 for *Kat2a* cKO and control mice we found a significant increase in editing frequency at the B site of the editing cassette that was due to an increase in the relative abundance of the ABCD-edited and AB-edited variants, which were the second- and third-most expressed variants in the CA1 (**Table S6**), and a decrease in the variant edited at the D site. This translates to an increase in the VSV- and VNI-protein isoforms and a decrease in the INV-protein isoform. Notably, an the increased VNI- as well as the VSV-protein isoforms have been associated with decreased function of the HTR2C receptor, since the edited protein region is involved in G-Protein-coupling (Berg et al, 2008; Burns et al, 1997; Schellekens et al, 2012). Together with decreased overall expression of the *Htr2c* gene, this leads to further reduced HTR2C signaling in the CA1 region. In summary panel B shows that A>I editing at site B was significantly altered, which was due to increase of the ABCD- and AB-transcript variants and decrease in the D-transcript variant (n=11-13/group, Holm-Sidak-corrected multiple, two-sided t-tests, \*\*\* $p < 0.001$ , \* $p < 0.05$ ). Error bars represent S.E.M.

Discussion of the presented data: We were able to employ our dataset to investigate RNA-editing at known sites and found, that the *Htr2c* mRNA was edited to increase variant frequencies that are associated with compromised protein function. Since mRNA editing is occurring co-transcriptionally and before splicing (Bentley, 2014), we therefore speculate that loss of *Kat2a* and therefore decreased histone acetylation during transcription may lead to a decreased RNA-polIII-dependent transcription rate, which leaves the editing enzymes (ADAR) with more time to carry out the necessary chemical reactions (Bentley, 2014) (Rodriguez et al, 2012).

**Bentley DL (2014) Coupling mRNA processing with transcription in time and space. *Nat Rev Genet* 15: 163-175**

**Berg KA, Clarke WP, Cunningham KA, Spampinato U (2008) Fine-tuning serotonin2c receptor function in the brain: molecular and functional implications. *Neuropharmacology* 55: 969-976**

**Burns CM, Chu H, Rueter SM, Hutchinson LK, Canton H, Sanders-Bush E, Emeson RB (1997) Regulation of serotonin-2C receptor G-protein coupling by RNA editing. *Nature* 387: 303-308**

**Rodriguez J, Menet JS, Rosbash M (2012) Nascent-seq indicates widespread cotranscriptional RNA editing in *Drosophila*. *Mol Cell* 47: 27-37**

**Schellekens H, Clarke G, Jeffery IB, Dinan TG, Cryan JF (2012) Dynamic 5-HT2C receptor editing in a mouse model of obesity. *PLoS One* 7: e32266**

**Table S1. Genes expressed in hippocampal CA1 region****A. TOP50 genes expressed in CA1**

| <b>Ensembl Gene ID</b> | <b>MGI Symbol</b> |
|------------------------|-------------------|
| ENSMUSG00000024617     | Camk2a            |
| ENSMUSG00000074657     | Kif5a             |
| ENSMUSG00000005089     | Slc1a2            |
| ENSMUSG00000001175     | Calm1             |
| ENSMUSG00000037852     | Cpe               |
| ENSMUSG00000027273     | Snap25            |
| ENSMUSG00000028161     | Ppp3ca            |
| ENSMUSG00000026576     | Atp1b1            |
| ENSMUSG00000029309     | Sparcl1           |
| ENSMUSG00000040907     | Atp1a3            |
| ENSMUSG00000021268     | Meg3              |
| ENSMUSG00000036438     | Calm2             |
| ENSMUSG00000098178     | RP23-81C12.3      |
| ENSMUSG00000041607     | Mbp               |
| ENSMUSG00000031517     | Gpm6a             |
| ENSMUSG00000037742     | Eef1a1            |
| ENSMUSG00000035864     | Syt1              |
| ENSMUSG00000022892     | App               |
| ENSMUSG00000023944     | Hsp90ab1          |
| ENSMUSG00000028833     | Ncdn              |
| ENSMUSG00000059213     | Ddn               |
| ENSMUSG00000031425     | Plp1              |
| ENSMUSG00000025867     | Cplx2             |
| ENSMUSG00000036564     | Ndr4              |
| ENSMUSG00000004207     | Psap              |
| ENSMUSG00000030695     | Aldoa             |
| ENSMUSG00000015222     | Map2              |
| ENSMUSG00000051853     | Arf3              |
| ENSMUSG00000019943     | Atp2b1            |
| ENSMUSG00000019370     | Calm3             |
| ENSMUSG00000025203     | Scd2              |
| ENSMUSG00000057738     | Sptan1            |
| ENSMUSG00000024661     | Fth1              |
| ENSMUSG00000027254     | Map1a             |
| ENSMUSG00000014602     | Kif1a             |
| ENSMUSG00000044349     | Snhg11            |
| ENSMUSG00000024758     | Rtn3              |
| ENSMUSG00000032294     | Pkm               |
| ENSMUSG00000040785     | Ttc3              |
| ENSMUSG00000019877     | Serinc1           |
| ENSMUSG00000020431     | Adcy1             |
| ENSMUSG00000033981     | Gria2             |
| ENSMUSG00000046093     | Hpcal4            |
| ENSMUSG00000020524     | Gria1             |
| ENSMUSG00000025393     | Atp5b             |



ENSMUSG00000026473 Glul  
 ENSMUSG00000056486 Chn1  
 ENSMUSG00000031342 Gpm6b  
 ENSMUSG00000079037 Prnp  
 ENSMUSG00000034187 Nsf

## B. Pathway analysis of TOP 50 genes

### Functional annotation of Top50 expressed genes in mouse CA1 (from DESeq2 output)

red: terms associated with neuronal function  
 \*\*\*:FDR<0.001; \*\*:FDR<0.01; \*:FDR<0.05; #:FDR<0.1

| KEGG-Pathway Term                            | Fold Enrichment | PValue  | FDR     | Significant? |
|----------------------------------------------|-----------------|---------|---------|--------------|
| mmu04720:Long-term potentiation              | 21.4            | 4.9E-06 | 4.7E-05 | ***          |
| mmu05014:Amyotrophic lateral sclerosis (ALS) | 18.3            | 1.1E-03 | 1.0E-02 | **           |
| mmu04020:Calcium signaling pathway           | 6.9             | 4.4E-03 | 4.1E-02 | *            |
| mmu04114:Oocyte meiosis                      | 8.8             | 8.6E-03 | 8.0E-02 | #            |
| mmu05010:Alzheimer's disease                 | 5.9             | 2.5E-02 | 2.1E-01 | ns.          |

| GO Term                                                                             | Fold Enrichment | PValue  | FDR      | Significant? |
|-------------------------------------------------------------------------------------|-----------------|---------|----------|--------------|
| GO:0007268~synaptic transmission                                                    | 11.1            | 1.4E-07 | 1.87E-06 | ***          |
| GO:0006164~purine nucleotide biosynthetic process                                   | 13.5            | 6.6E-05 | 9.06E-04 | ***          |
| GO:0009142~nucleoside triphosphate biosynthetic process                             | 16.3            | 2.1E-04 | 2.94E-03 | **           |
| GO:0034404~nucleobase, nucleoside and nucleotide biosynthetic process               | 10.3            | 2.3E-04 | 3.15E-03 | **           |
| GO:0034654~nucleobase, nucleoside, nucleotide and nucleic acid biosynthetic process | 10.3            | 2.3E-04 | 3.15E-03 | **           |
| GO:0007611~learning or memory                                                       | 15.0            | 3.0E-04 | 4.07E-03 | **           |
| GO:0009144~purine nucleoside triphosphate metabolic process                         | 13.6            | 4.3E-04 | 5.83E-03 | **           |
| GO:0009260~ribonucleotide biosynthetic process                                      | 13.4            | 4.5E-04 | 6.20E-03 | **           |
| GO:0007616~long-term memory                                                         | 83.1            | 5.4E-04 | 7.40E-03 | **           |
| GO:0009150~purine ribonucleotide metabolic process                                  | 12.0            | 6.8E-04 | 9.27E-03 | **           |
| GO:0055082~cellular chemical homeostasis                                            | 6.1             | 7.4E-04 | 1.02E-02 | *            |
| GO:0006812~cation transport                                                         | 4.8             | 9.6E-04 | 1.31E-02 | *            |
| GO:0050801~ion homeostasis                                                          | 5.7             | 1.1E-03 | 1.49E-02 | *            |
| GO:0006753~nucleoside phosphate metabolic process                                   | 6.8             | 1.5E-03 | 2.08E-02 | *            |
| GO:0030001~metal ion transport                                                      | 5.0             | 2.1E-03 | 2.85E-02 | *            |
| GO:0007632~visual behavior                                                          | 32.1            | 3.7E-03 | 4.93E-02 | *            |
| GO:0043242~negative regulation of protein complex disassembly                       | 24.3            | 6.4E-03 | 8.40E-02 | #            |
| GO:0050804~regulation of synaptic transmission                                      | 9.8             | 7.2E-03 | 9.50E-02 | #            |

**Table S2: Differential expressed genes amongst KAT2A cKO and control mice in the CA1 region**

| <u>Up(WT naive vs. novelty)</u> |                     | <u>Down(WT naive vs. novelty)</u> |                     |
|---------------------------------|---------------------|-----------------------------------|---------------------|
| <u>MGI Symbol</u>               | <u>ENSEMBL-ID</u>   | <u>MGI Symbol</u>                 | <u>ENSEMBL-ID</u>   |
| Egr2                            | ENSMUSG00000037868  | AB041806                          | ENSMUSG00000046109  |
| Fos                             | ENSMUSG00000021250  | Aim1                              | ENSMUSG00000019866  |
| Fosb                            | ENSMUSG00000003545  | Egf                               | ENSMUSG00000028017  |
| Egr1                            | ENSMUSG00000038418  | Gm12908                           | ENSMUSG000000087200 |
| Egr4                            | ENSMUSG000000071341 | Dcaf12l2                          | ENSMUSG000000050926 |
| 1700016P03Rik                   | ENSMUSG000000085609 | Tlr9                              | ENSMUSG000000045322 |
| Maff                            | ENSMUSG000000042622 | Tmem194b                          | ENSMUSG000000043015 |
| Fam83d                          | ENSMUSG000000027654 | Samsn1                            | ENSMUSG000000022876 |
| Nr4a1                           | ENSMUSG000000023034 | Gm5577                            | ENSMUSG000000084950 |
| Homer1                          | ENSMUSG000000007617 | A2m                               | ENSMUSG000000030111 |
| Arc                             | ENSMUSG000000022602 | Adrb3                             | ENSMUSG000000031489 |
| Dusp5                           | ENSMUSG000000034765 | Klhdc9                            | ENSMUSG000000045259 |
| Sik1                            | ENSMUSG000000024042 | BC024139                          | ENSMUSG000000044361 |
| Arl4d                           | ENSMUSG000000034936 | Edn1                              | ENSMUSG000000021367 |
| Plekhf1                         | ENSMUSG000000074170 | Micall2                           | ENSMUSG000000036718 |
| Nr4a3                           | ENSMUSG000000028341 | Tnfsf10                           | ENSMUSG000000039304 |
| Sgk1                            | ENSMUSG000000019970 | Apobec1                           | ENSMUSG000000040613 |
| Per1                            | ENSMUSG000000020893 | Hhex                              | ENSMUSG000000024986 |
| Egr3                            | ENSMUSG000000033730 | Ccno                              | ENSMUSG000000042417 |
| Nostrin                         | ENSMUSG000000034738 | Gprc5c                            | ENSMUSG000000051043 |
| Fas                             | ENSMUSG000000024778 | Heyl                              | ENSMUSG000000032744 |
| Cdkn1a                          | ENSMUSG000000023067 | RP23-285C18.2                     | ENSMUSG000000097415 |
| Tsc22d3                         | ENSMUSG000000031431 | Rassf9                            | ENSMUSG000000044921 |
| Dio2                            | ENSMUSG000000007682 | Pabpc4l                           | ENSMUSG000000090919 |
| Arid5a                          | ENSMUSG000000037447 | Pcdhb1                            | ENSMUSG000000051663 |
| Junb                            | ENSMUSG000000052837 | Gm11948                           | ENSMUSG000000087055 |
| Fam46a                          | ENSMUSG000000032265 | Irs4                              | ENSMUSG000000054667 |
| Ppp1r3g                         | ENSMUSG000000050423 | Fam181a                           | ENSMUSG000000096753 |
| Errfi1                          | ENSMUSG000000028967 | Cd180                             | ENSMUSG000000021624 |
| Klf2                            | ENSMUSG000000055148 | Gm20692                           | ENSMUSG000000093739 |
| Mc4r                            | ENSMUSG000000047259 | G530011O06Rik                     | ENSMUSG000000072844 |
| Nr4a2                           | ENSMUSG000000026826 | Klhl6                             | ENSMUSG000000043008 |
| Fhl3                            | ENSMUSG000000032643 |                                   |                     |
| Fosl2                           | ENSMUSG000000029135 |                                   |                     |
| Map3k19                         | ENSMUSG000000051590 |                                   |                     |
| Rasd1                           | ENSMUSG000000049892 |                                   |                     |
| Fam150b                         | ENSMUSG000000054204 |                                   |                     |
| Tiparp                          | ENSMUSG000000034640 |                                   |                     |
| Xdh                             | ENSMUSG000000024066 |                                   |                     |
| Gadd45b                         | ENSMUSG000000015312 |                                   |                     |
| Arl5b                           | ENSMUSG000000017418 |                                   |                     |
| Sertad1                         | ENSMUSG000000008384 |                                   |                     |
| Prr5                            | ENSMUSG000000036106 |                                   |                     |
| Gpr3                            | ENSMUSG000000049649 |                                   |                     |
| Utp14b                          | ENSMUSG000000079470 |                                   |                     |
| Zdbf2                           | ENSMUSG000000027520 |                                   |                     |
| Spsb1                           | ENSMUSG000000039911 |                                   |                     |
| Dusp6                           | ENSMUSG000000019960 |                                   |                     |
| Jhdm1d                          | ENSMUSG000000042599 |                                   |                     |
| Plin4                           | ENSMUSG000000002831 |                                   |                     |
| Coq10b                          | ENSMUSG000000025981 |                                   |                     |
| Gpt2                            | ENSMUSG000000031700 |                                   |                     |

|           |                    |
|-----------|--------------------|
| Tnfrsf12a | ENSMUSG00000023905 |
| Dnajb5    | ENSMUSG00000036052 |
| Adipor2   | ENSMUSG00000030168 |
| Nptx2     | ENSMUSG00000059991 |
| Mettl11b  | ENSMUSG00000040113 |
| Per2      | ENSMUSG00000055866 |
| Pcsk1     | ENSMUSG00000021587 |
| Lingo3    | ENSMUSG00000051067 |
| Nfkbia    | ENSMUSG00000021025 |
| Mfsd2a    | ENSMUSG00000028655 |
| Irs2      | ENSMUSG00000038894 |
| Zfp189    | ENSMUSG00000039634 |
| Dnajb1    | ENSMUSG00000005483 |
| Smim3     | ENSMUSG00000038059 |
| Midn      | ENSMUSG00000035621 |
| Slc2a1    | ENSMUSG00000028645 |
| Klf15     | ENSMUSG00000030087 |
| Rrp8      | ENSMUSG00000030888 |
| Rasl11b   | ENSMUSG00000049907 |
| Ier5      | ENSMUSG00000056708 |
| Dusp4     | ENSMUSG00000031530 |
| Lrmp      | ENSMUSG00000030263 |
| Zfp319    | ENSMUSG00000074140 |

**Up(WT naive vs. *Kat2a* cKO naive)**

| <b>MGI Symbol</b> | <b>ENSEMBL-ID</b>   |
|-------------------|---------------------|
| Klk10             | ENSMUSG00000030693  |
| Otop2             | ENSMUSG00000050201  |
| Cdhr1             | ENSMUSG00000021803  |
| Cacng6            | ENSMUSG00000078815  |
| Ano2              | ENSMUSG00000038115  |
| B3gnt8            | ENSMUSG00000059479  |
| Baiap3            | ENSMUSG00000047507  |
| Sec14l4           | ENSMUSG00000019368  |
| Tbxa2r            | ENSMUSG00000034881  |
| Plb1              | ENSMUSG00000029134  |
| Adamts18          | ENSMUSG00000053399  |
| Pstpip1           | ENSMUSG00000032322  |
| Trpa1             | ENSMUSG00000032769  |
| Cpxm2             | ENSMUSG00000030862  |
| Tgm3              | ENSMUSG00000027401  |
| Trp73             | ENSMUSG00000029026  |
| Ush1g             | ENSMUSG00000045288  |
| P2rx5             | ENSMUSG00000005950  |
| Rspo1             | ENSMUSG00000028871  |
| Cldn26            | ENSMUSG00000022715  |
| Crabp2            | ENSMUSG00000004885  |
| Igfbpl1           | ENSMUSG00000035551  |
| Loxl1             | ENSMUSG00000032334  |
| Zfp296            | ENSMUSG00000011267  |
| Epor              | ENSMUSG00000006235  |
| Gm9821            | ENSMUSG000000095332 |
| Medag             | ENSMUSG00000029659  |
| CiCa2             | ENSMUSG00000028262  |
| Tjp3              | ENSMUSG00000034917  |
| Cd163             | ENSMUSG00000008845  |
| Jsrp1             | ENSMUSG00000020216  |

**Down(WT naive vs. *Kat2a* cKO naive)**

| <b>MGI Symbol</b> | <b>ENSEMBL-ID</b>         |
|-------------------|---------------------------|
| Pcdhb4            | ENSMUSG00000045689        |
| Akr1c14           | ENSMUSG00000033715        |
| Htr2c             | ENSMUSG00000041380        |
| Col11a1           | ENSMUSG00000027966        |
| Hcrtr2            | ENSMUSG00000032360        |
| Gm12198           | ENSMUSG00000085564        |
| A530058N18Rik     | ENSMUSG00000087694        |
| 5430416O09Rik     | ENSMUSG00000028475        |
| Spink10           | ENSMUSG00000044176        |
| Irak3             | ENSMUSG00000020227        |
| Zfp934            | ENSMUSG00000074865        |
| Npbwr1            | ENSMUSG00000033774        |
| Ghsr              | ENSMUSG00000051136        |
| <i>Atp4a</i>      | <i>ENSMUSG00000005553</i> |
| Gm5815            | ENSMUSG00000046952        |
| G530011O06Rik     | ENSMUSG00000072844        |
| 2310042E22Rik     | ENSMUSG00000090356        |
| Cyp26b1           | ENSMUSG00000063415        |
| AC140785.1        | ENSMUSG00000097869        |
| Adcyap1           | ENSMUSG00000024256        |
| Penk              | ENSMUSG00000045573        |
| 2410018L13Rik     | ENSMUSG00000073164        |
| <b>Kat2a</b>      | <b>ENSMUSG00000020918</b> |
| Grem1             | ENSMUSG00000074934        |
| Oxr1              | ENSMUSG00000022307        |

|               |                    |
|---------------|--------------------|
| RP23-42D10.1  | ENSMUSG00000098072 |
| Gm4737        | ENSMUSG00000048087 |
| Atp2c2        | ENSMUSG00000034112 |
| Itgb7         | ENSMUSG00000001281 |
| Crlf1         | ENSMUSG00000007888 |
| Smtnl2        | ENSMUSG00000045667 |
| Zfp185        | ENSMUSG00000031351 |
| Clspn         | ENSMUSG00000042489 |
| Kcne3         | ENSMUSG00000035165 |
| RP24-158L2.1  | ENSMUSG00000098097 |
| Pgpep1l       | ENSMUSG00000030553 |
| Ucma          | ENSMUSG00000026668 |
| Vwa3a         | ENSMUSG00000030889 |
| Epn3          | ENSMUSG00000010080 |
| Adamts13      | ENSMUSG00000014852 |
| Rhcg          | ENSMUSG00000030549 |
| Gm15860       | ENSMUSG00000087336 |
| A630023P12Rik | ENSMUSG00000048215 |
| Ccdc129       | ENSMUSG00000037973 |
| Sypl2         | ENSMUSG00000027887 |
| Diap3         | ENSMUSG00000022021 |
| Myo1h         | ENSMUSG00000066952 |
| Rreb1         | ENSMUSG00000039087 |
| Otogl         | ENSMUSG00000091455 |
| RP24-413G2.4  | ENSMUSG00000098128 |
| Myh3          | ENSMUSG00000020908 |
| Col22a1       | ENSMUSG00000079022 |
| Igdcc3        | ENSMUSG00000032394 |
| Mapk12        | ENSMUSG00000022610 |
| Dkk1          | ENSMUSG00000030792 |
| Serping1      | ENSMUSG00000023224 |
| Slc29a1       | ENSMUSG00000023942 |
| Ttc22         | ENSMUSG00000034919 |
| Ppl           | ENSMUSG00000039457 |
| Gck           | ENSMUSG00000041798 |
| Hbb-b1        | ENSMUSG00000052305 |
| Slc26a8       | ENSMUSG00000036196 |
| Fam160a1      | ENSMUSG00000051000 |
| Blnk          | ENSMUSG00000061132 |
| Spint1        | ENSMUSG00000027315 |

**Up(WT novelty vs. *Kat2a* cKO novelty)**

| <b>MGI Symbol</b> | <b>ENSEMBL-ID</b>  |
|-------------------|--------------------|
| Tbxa2r            | ENSMUSG00000034881 |
| Baiap3            | ENSMUSG00000047507 |
| Capn11            | ENSMUSG00000058626 |
| Cldn26            | ENSMUSG00000022715 |
| Trp73             | ENSMUSG00000029026 |
| RP23-42D10.1      | ENSMUSG00000098072 |
| Tacr2             | ENSMUSG00000020081 |
| Ush1g             | ENSMUSG00000045288 |
| Cdhr1             | ENSMUSG00000021803 |
| Spn               | ENSMUSG00000051457 |
| B3gnt8            | ENSMUSG00000059479 |
| Itgb7             | ENSMUSG00000001281 |
| Col6a5            | ENSMUSG00000091345 |
| BC024139          | ENSMUSG00000044361 |

**Down(WT novelty vs. *Kat2a* cKO novelty)**

| <b>MGI Symbol</b> | <b>ENSEMBL-ID</b>  |
|-------------------|--------------------|
| Eva1c             | ENSMUSG00000039903 |
| AC129605.1        | ENSMUSG00000097789 |
| Plekhg1           | ENSMUSG00000040624 |
| Mmrn2             | ENSMUSG00000041445 |
| Igfbp4            | ENSMUSG00000017493 |
| Gm15710           | ENSMUSG00000084111 |
| Gm15631           | ENSMUSG00000085067 |
| Ddn               | ENSMUSG00000059213 |
| Sema3a            | ENSMUSG00000028883 |
| Zfp97             | ENSMUSG00000095990 |
| Akr1c14           | ENSMUSG00000033715 |
| Rpl9-ps7          | ENSMUSG00000047965 |
| Aldh1a1           | ENSMUSG00000053279 |
| Oprk1             | ENSMUSG00000025905 |

|               |                    |               |                           |
|---------------|--------------------|---------------|---------------------------|
| Klk10         | ENSMUSG00000030693 | Scn3b         | ENSMUSG00000049281        |
| Cacng6        | ENSMUSG00000078815 | Htr2a         | ENSMUSG00000034997        |
| AC145610.1    | ENSMUSG00000097593 | Htr1a         | ENSMUSG00000021721        |
| Col6a2        | ENSMUSG00000020241 | Akr1c18       | ENSMUSG00000021214        |
| Pstpip1       | ENSMUSG00000032322 | Coch          | ENSMUSG00000020953        |
| A2m           | ENSMUSG00000030111 | Stac          | ENSMUSG00000032502        |
| Otof          | ENSMUSG00000062372 | Rpl9-ps4      | ENSMUSG00000094989        |
| Cd109         | ENSMUSG00000046186 | Gm3667        | ENSMUSG00000090691        |
| Gm15422       | ENSMUSG00000082738 | Myl4          | ENSMUSG00000061086        |
| Plb1          | ENSMUSG00000029134 | Gm10012       | ENSMUSG00000057580        |
| Ucma          | ENSMUSG00000026668 | Scn4b         | ENSMUSG00000046480        |
| Ano2          | ENSMUSG00000038115 | Fam19a1       | ENSMUSG00000059187        |
| Xpnpep2       | ENSMUSG00000037005 | Gm10029       | ENSMUSG00000068324        |
| Clca1         | ENSMUSG00000056025 | Unc13c        | ENSMUSG00000062151        |
| Spata18       | ENSMUSG00000029155 | Meox1         | ENSMUSG00000001493        |
| Olfm4         | ENSMUSG00000022026 | AC164597.1    | ENSMUSG00000097493        |
| Gm15478       | ENSMUSG00000085363 | Mc4r          | ENSMUSG00000047259        |
| Dnahc11       | ENSMUSG00000018581 | Apln          | ENSMUSG00000037010        |
| RP24-158L2.1  | ENSMUSG00000098097 | Npbwr1        | ENSMUSG00000033774        |
| Mfap4         | ENSMUSG00000042436 | Htr1b         | ENSMUSG00000049511        |
| Epn3          | ENSMUSG00000010080 | Plekha2       | ENSMUSG00000031557        |
| Gm9821        | ENSMUSG00000095332 | Gm11263       | ENSMUSG00000083496        |
| Wdr66         | ENSMUSG00000029442 | Adcyap1       | ENSMUSG00000024256        |
| Epb4.114a     | ENSMUSG00000024376 | Lefty1        | ENSMUSG00000038793        |
| Scn7a         | ENSMUSG00000034810 | Gm15721       | ENSMUSG00000085565        |
| 5330416C01Rik | ENSMUSG00000054944 | Htra4         | ENSMUSG00000037406        |
| Igdcc3        | ENSMUSG00000032394 | Slc35d3       | ENSMUSG00000050473        |
| Thbs3         | ENSMUSG00000028047 | Gm17732       | ENSMUSG00000091744        |
| Llgl2         | ENSMUSG00000020782 | Fam83d        | ENSMUSG00000027654        |
| Gm11721       | ENSMUSG00000087064 | Gm4613        | ENSMUSG00000090467        |
| Scube2        | ENSMUSG00000007279 | Rps3a3        | ENSMUSG00000059751        |
| Hydin         | ENSMUSG00000059854 | Cyp26b1       | ENSMUSG00000063415        |
| Ifi203        | ENSMUSG00000039997 | Spink10       | ENSMUSG00000044176        |
| Ccdc153       | ENSMUSG00000070306 | Ghsr          | ENSMUSG00000051136        |
| Tex15         | ENSMUSG00000009628 | Ninj2         | ENSMUSG00000041377        |
| Ccdc88b       | ENSMUSG00000047810 | Slitrk6       | ENSMUSG00000045871        |
| Ppp2r3d       | ENSMUSG00000093803 | Cdk15         | ENSMUSG00000026023        |
| Cdsn          | ENSMUSG00000039518 | <b>Kat2a</b>  | <b>ENSMUSG00000020918</b> |
| Myo1h         | ENSMUSG00000066952 | C1ql2         | ENSMUSG00000036907        |
| Pou6f2        | ENSMUSG00000009734 | Grem1         | ENSMUSG00000074934        |
| Ybx2          | ENSMUSG00000018554 | Penk          | ENSMUSG00000045573        |
| Zglp1         | ENSMUSG00000079681 | Oxr1          | ENSMUSG00000022307        |
| 1700040L02Rik | ENSMUSG00000019945 | 2410018L13Rik | ENSMUSG00000073164        |
| Adamts14      | ENSMUSG00000059901 |               |                           |
| Best3         | ENSMUSG00000020169 |               |                           |
| Rreb1         | ENSMUSG00000039087 |               |                           |
| Tjp3          | ENSMUSG00000034917 |               |                           |
| Col5a3        | ENSMUSG00000004098 |               |                           |
| Gm4779        | ENSMUSG00000045010 |               |                           |
| Igfbpl1       | ENSMUSG00000035551 |               |                           |
| Zfp185        | ENSMUSG00000031351 |               |                           |
| Lpar5         | ENSMUSG00000067714 |               |                           |
| Papln         | ENSMUSG00000021223 |               |                           |
| Ccno          | ENSMUSG00000042417 |               |                           |
| Bcl2l15       | ENSMUSG00000044165 |               |                           |
| Lpar2         | ENSMUSG00000031861 |               |                           |
| Tnni3k        | ENSMUSG00000040086 |               |                           |

|               |                    |
|---------------|--------------------|
| Iqub          | ENSMUSG00000046192 |
| Ccdc162       | ENSMUSG00000075225 |
| Loxl1         | ENSMUSG00000032334 |
| AC152181.1    | ENSMUSG00000097259 |
| Derl3         | ENSMUSG00000009092 |
| Aldh1a3       | ENSMUSG00000015134 |
| Gm216         | ENSMUSG00000073650 |
| Vwa3a         | ENSMUSG00000030889 |
| Pgpep1l       | ENSMUSG00000030553 |
| Figf          | ENSMUSG00000031380 |
| Sec16b        | ENSMUSG00000026589 |
| Gm16119       | ENSMUSG00000010492 |
| Dnaaf3        | ENSMUSG00000055809 |
| Zfp296        | ENSMUSG00000011267 |
| Fxyd2         | ENSMUSG00000059412 |
| Medag         | ENSMUSG00000029659 |
| Gm7120        | ENSMUSG00000074634 |
| Catsperg1     | ENSMUSG00000049676 |
| Tacr1         | ENSMUSG00000030043 |
| 1700026D08Rik | ENSMUSG00000011154 |
| Otogl         | ENSMUSG00000091455 |
| Gm8261        | ENSMUSG00000081718 |
| Anxa1         | ENSMUSG00000024659 |
| Hpn           | ENSMUSG00000001249 |
| Gm15423       | ENSMUSG00000087082 |
| Kcnh6         | ENSMUSG00000001901 |
| Slc26a8       | ENSMUSG00000036196 |
| Mcm10         | ENSMUSG00000026669 |
| Ngb           | ENSMUSG00000021032 |
| Adamts13      | ENSMUSG00000014852 |
| Fam179a       | ENSMUSG00000045761 |
| Sypl2         | ENSMUSG00000027887 |
| Ryr1          | ENSMUSG00000030592 |
| Pygl          | ENSMUSG00000021069 |
| Ppl           | ENSMUSG00000039457 |
| 6820408C15Rik | ENSMUSG00000032680 |
| Xrra1         | ENSMUSG00000035211 |
| RP24-413G2.4  | ENSMUSG00000098128 |
| Acy3          | ENSMUSG00000024866 |
| Rln1          | ENSMUSG00000039097 |
| Ptpn14        | ENSMUSG00000026604 |
| Aloxe3        | ENSMUSG00000020892 |
| Epor          | ENSMUSG00000006235 |
| AC149052.1    | ENSMUSG00000097246 |
| Nbeal2        | ENSMUSG00000056724 |
| Gm867         | ENSMUSG00000050157 |
| Gm5577        | ENSMUSG00000084950 |
| Atg9b         | ENSMUSG00000038295 |
| Ccdc155       | ENSMUSG00000038292 |
| AC122200.1    | ENSMUSG00000097133 |
| Sebox         | ENSMUSG00000001103 |
| Cpxm2         | ENSMUSG00000030862 |
| Hes5          | ENSMUSG00000048001 |
| Tmem181c-ps   | ENSMUSG00000093880 |
| Ccl28         | ENSMUSG00000074715 |
| Unc13d        | ENSMUSG00000057948 |
| Serping1      | ENSMUSG00000023224 |

|               |                     |
|---------------|---------------------|
| Col6a1        | ENSMUSG00000001119  |
| Dnase1l2      | ENSMUSG000000024136 |
| Fbxo48        | ENSMUSG000000044966 |
| Ankrd53       | ENSMUSG000000014747 |
| Fndc9         | ENSMUSG000000048721 |
| Gm14137       | ENSMUSG000000055926 |
| Gm10658       | ENSMUSG000000074284 |
| Fam117a       | ENSMUSG000000038893 |
| Crybb3        | ENSMUSG000000029352 |
| Crocc         | ENSMUSG000000040860 |
| Dock6         | ENSMUSG000000032198 |
| Rcor2         | ENSMUSG000000024968 |
| Pnck          | ENSMUSG000000002012 |
| Mxd3          | ENSMUSG000000021485 |
| Ccdc3         | ENSMUSG000000026676 |
| Homer3        | ENSMUSG000000003573 |
| Tm6sf2        | ENSMUSG000000036151 |
| 1700016P03Rik | ENSMUSG000000085609 |
| Fam183b       | ENSMUSG000000049154 |
| Kif27         | ENSMUSG000000060176 |
| Zfp57         | ENSMUSG000000036036 |
| Trpc7         | ENSMUSG000000021541 |
| Fam167a       | ENSMUSG000000035095 |
| Kcp           | ENSMUSG000000059022 |
| Strc          | ENSMUSG000000033498 |
| Rnf207        | ENSMUSG000000058498 |
| Atoh8         | ENSMUSG000000037621 |
| Blnk          | ENSMUSG000000061132 |
| Scarf2        | ENSMUSG000000012017 |
| Magel2        | ENSMUSG000000056972 |
| Gm15567       | ENSMUSG000000084974 |
| Slc16a11      | ENSMUSG000000040938 |
| Tonsl         | ENSMUSG000000059323 |
| 1700019L03Rik | ENSMUSG000000038987 |

**Up(Kat2a cKO naive vs. novelty)**

| <b>MGI Symbol</b> | <b>ENSEMBL-ID</b>   |
|-------------------|---------------------|
| Egr2              | ENSMUSG000000037868 |
| Fosb              | ENSMUSG000000003545 |
| Fos               | ENSMUSG000000021250 |
| 1700016P03Rik     | ENSMUSG000000085609 |
| Egr1              | ENSMUSG000000038418 |
| Egr4              | ENSMUSG000000071341 |
| Mir132            | ENSMUSG000000065537 |
| Homer1            | ENSMUSG000000007617 |
| Arc               | ENSMUSG000000022602 |
| Nr4a1             | ENSMUSG000000023034 |
| Sik1              | ENSMUSG000000024042 |
| Fosl2             | ENSMUSG000000029135 |
| Nr4a3             | ENSMUSG000000028341 |
| Fam46a            | ENSMUSG000000032265 |
| Dusp5             | ENSMUSG000000034765 |
| RP23-204I16.2     | ENSMUSG000000098061 |
| Junb              | ENSMUSG000000052837 |
| Fam150b           | ENSMUSG000000054204 |
| Egr3              | ENSMUSG000000033730 |
| Maff              | ENSMUSG000000042622 |

**Down(Kat2a cKO naive vs. novelty)**

| <b>MGI Symbol</b> | <b>ENSEMBL-ID</b>   |
|-------------------|---------------------|
| Adamts18          | ENSMUSG000000053399 |
| Oacyl             | ENSMUSG000000046610 |
| Clec2d            | ENSMUSG000000030157 |
| Ehhadh            | ENSMUSG000000022853 |
| Gm6970            | ENSMUSG000000091230 |
| 9930012K11Rik     | ENSMUSG000000044551 |
| Nkx3-1            | ENSMUSG000000022061 |
| Mamstr            | ENSMUSG000000042918 |
| Tnfsf10           | ENSMUSG000000039304 |
| Gm20633           | ENSMUSG000000093553 |
| Plekho2           | ENSMUSG000000050721 |
| Pkdrej            | ENSMUSG000000052496 |
| Rbm46             | ENSMUSG000000033882 |
| Rnf138rt1         | ENSMUSG000000083695 |
| Col22a1           | ENSMUSG000000079022 |
| Clspn             | ENSMUSG000000042489 |
| 0610040B10Rik     | ENSMUSG000000089889 |
| Gm12178           | ENSMUSG000000081952 |
| Cd180             | ENSMUSG000000021624 |

|               |                    |
|---------------|--------------------|
| Tnfrsf25      | ENSMUSG00000024793 |
| Zglp1         | ENSMUSG00000079681 |
| Rtp1          | ENSMUSG00000033383 |
| Atoh8         | ENSMUSG00000037621 |
| 8430408G22Rik | ENSMUSG00000048489 |
| Tm6sf2        | ENSMUSG00000036151 |
| Gpr3          | ENSMUSG00000049649 |
| Map3k19       | ENSMUSG00000051590 |
| Zdbf2         | ENSMUSG00000027520 |
| Agxt2l1       | ENSMUSG00000019232 |
| Dnase1l2      | ENSMUSG00000024136 |
| Plekhf1       | ENSMUSG00000074170 |
| Per1          | ENSMUSG00000020893 |
| Gadd45b       | ENSMUSG00000015312 |
| Nr4a2         | ENSMUSG00000026826 |
| Sgk1          | ENSMUSG00000019970 |
| Plin4         | ENSMUSG00000002831 |
| Cdkn1a        | ENSMUSG00000023067 |
| Gm11201       | ENSMUSG00000085941 |
| Gem           | ENSMUSG00000028214 |
| Dusp6         | ENSMUSG00000019960 |
| 1810011O10Rik | ENSMUSG00000056313 |
| Noxred1       | ENSMUSG00000072919 |
| Errfi1        | ENSMUSG00000028967 |
| Arl5b         | ENSMUSG00000017418 |
| Crip3         | ENSMUSG00000023968 |
| Tiparp        | ENSMUSG00000034640 |
| Ankrd53       | ENSMUSG00000014747 |
| Rasl11a       | ENSMUSG00000029641 |
| Utp14b        | ENSMUSG00000079470 |
| Nfil3         | ENSMUSG00000056749 |
| Tsc22d3       | ENSMUSG00000031431 |
| Midn          | ENSMUSG00000035621 |
| Coq10b        | ENSMUSG00000025981 |
| Arl4d         | ENSMUSG00000034936 |
| 1700102P08Rik | ENSMUSG00000032611 |
| Fas           | ENSMUSG00000024778 |
| Dio2          | ENSMUSG00000007682 |
| Arid5a        | ENSMUSG00000037447 |
| Per2          | ENSMUSG00000055866 |
| Mlph          | ENSMUSG00000026303 |
| Bag3          | ENSMUSG00000030847 |
| Hpn           | ENSMUSG00000001249 |
| Irs2          | ENSMUSG00000038894 |
| Plk3          | ENSMUSG00000028680 |
| Mir374        | ENSMUSG00000076269 |
| Dnajb1        | ENSMUSG00000005483 |
| Jhdm1d        | ENSMUSG00000042599 |
| Gm15478       | ENSMUSG00000085363 |
| Sertad1       | ENSMUSG00000008384 |
| Dusp1         | ENSMUSG00000024190 |
| Spry4         | ENSMUSG00000024427 |
| Gpt2          | ENSMUSG00000031700 |
| Acer2         | ENSMUSG00000038007 |
| Dnajb5        | ENSMUSG00000036052 |
| Chrm4         | ENSMUSG00000040495 |
| A930039A15Rik | ENSMUSG00000078493 |



|         |                    |
|---------|--------------------|
| Nptx2   | ENSMUSG00000059991 |
| Gm13502 | ENSMUSG00000083287 |
| Dok3    | ENSMUSG00000035711 |
| Pcsk1   | ENSMUSG00000021587 |
| P4ha1   | ENSMUSG00000019916 |
| Hspb1   | ENSMUSG00000004951 |
| Zswim6  | ENSMUSG00000032846 |
| Klf2    | ENSMUSG00000055148 |
| Fastkd5 | ENSMUSG00000079043 |
| Gm13830 | ENSMUSG00000086368 |
| Uba6    | ENSMUSG00000035898 |
| Spata2l | ENSMUSG00000033594 |
| Ppp1r3g | ENSMUSG00000050423 |

**Table S3: Pathway analysis on differentially expressed genes.**

While MAPK signaling was normally induced in *Kat2a* cKO mice, genes functioning in “neuroactive ligand-receptor interaction” were commonly significantly enriched among down-regulated genes in the CA1 of *Kat2a* cKO mice. Genes selected for subsequent qPCR analysis are marked in **bold**.

|                                         |                                 |                                         |        |                                                          |                                                                                   |
|-----------------------------------------|---------------------------------|-----------------------------------------|--------|----------------------------------------------------------|-----------------------------------------------------------------------------------|
| WT vs. <i>Kat2a</i> cKO naïve           | Up                              | No enriched pathway found               | -      | -                                                        | -                                                                                 |
|                                         | Down                            | Neuroactive ligand-receptor interaction | 4.3E-3 | 2.6E-2                                                   | <b>Htr2c, Ghsr, Hctr2, Npbwr1</b>                                                 |
|                                         | All                             | Neuroactive ligand-receptor interaction | 3.8E-3 | 3.6E-2                                                   | <b>Htr2c, Ghsr, Hctr2, Npbwr1, P2rx5, Tbx2r</b>                                   |
| WT naïve vs. novelty                    | Up                              | MAPK signaling pathway                  | 1.5E-4 | 1.4E-3                                                   | <i>Fas, Fos, Dusp 4, Dusp5, Dusp6, Gadd45b, Nr4a1</i>                             |
|                                         |                                 | Adipocytokine signaling pathway         | 1.3E-3 | 1.2E-2                                                   | <i>Adipor2, Irs2, Nfkb1a, Slc2a1</i>                                              |
|                                         | Down                            | No enriched pathway found               | -      | -                                                        | -                                                                                 |
| All                                     | MAPK signaling pathway          | 1.7E-4                                  | 1.6E-3 | <i>Fas, Fos, Dusp4, Dusp5, Dusp6, Nr4a, Egf, Gadd45b</i> |                                                                                   |
|                                         | Adipocytokine signaling pathway | 2.4E-4                                  | 2.4E-3 | <i>Adipor2, Irs2, Irs4, Nfkb1a, Slc2a1</i>               |                                                                                   |
| <i>Kat2a</i> cKO naïve vs. novelty      | Up                              | MAPK signaling pathway                  | 1.9E-5 | 1.7E-4                                                   | <i>Fas, Fos, Dusp1, Dusp5, Dusp6, Nr4a1, Gadd45b, Hspb1</i>                       |
|                                         | Down                            | No enriched pathway found               | -      | -                                                        | -                                                                                 |
|                                         | All                             | MAPK signaling pathway                  | 5.4E-5 | 5.1E-4                                                   | <i>Fas, Fos, Dusp1, Dusp5, Dusp6, Nr4a1, Gadd45b, Hspb1, Il1a</i>                 |
| WT novelty vs. <i>Kat2a</i> cKO novelty | Up                              | ECM-receptor interaction                | 6.4E-4 | 5.9E-3                                                   | <i>Col5a3, Col6a1, Col6a2, Itgb7, Thbs3, Figf</i>                                 |
|                                         |                                 | Focal adhesion                          | 2.3E-3 | 2.2E-2                                                   |                                                                                   |
|                                         | Down                            | Neuroactive ligand-receptor interaction | 4.5E-5 | 2.8E-4                                                   | <b>Htr1a, Htr1b, Htr2a, Ghsr, Mc4r, Npbwr1, Oprk1</b>                             |
|                                         | All                             | Neuroactive ligand-receptor interaction | 2.4E-5 | 2.3E-4                                                   | <b>Htr1a, Htr1b, Htr2a, Ghsr, Lpar2, Mc4r, Npbwr1, Oprk1, Tacr1, Tacr2, Tbx2r</b> |
| ECM-receptor interaction                |                                 | 3.9E-3                                  | 3.6E-2 | <i>Col5a3, Col6a1, Col6a2, Itgb7, Thbs3</i>              |                                                                                   |

**Table S4: miRNome of the mouse CA1 region ranked by normalized readcount**

No significant differences were observed between control and *Kat2a* cKO mice (n=6). There are slight but non-significant changes in the order of the Top50-ranked (**bold**) miRNAs

| <b>Rank</b> | <b>All miRNAs &gt;10 reads<br/>(from controls)</b> | <b><i>Kat2a</i> cKO</b> |
|-------------|----------------------------------------------------|-------------------------|
| 1           | mmu-miR-127                                        | mmu-miR-127             |
| 2           | mmu-miR-181a                                       | mmu-miR-181a            |
| 3           | mmu-miR-26a                                        | mmu-miR-26a             |
| 4           | mmu-miR-22                                         | mmu-miR-22              |
| 5           | mmu-miR-434-3p                                     | mmu-miR-434-3p          |
| 6           | mmu-miR-9                                          | mmu-miR-9               |
| 7           | mmu-miR-191                                        | mmu-miR-191             |
| 8           | mmu-let-7f                                         | mmu-let-7f              |
| 9           | mmu-miR-128                                        | mmu-miR-128             |
| 10          | mmu-miR-92b                                        | mmu-miR-92b             |
|             |                                                    | mmu-miR-125b-           |
| 11          | mmu-miR-125b-5p                                    | 5p                      |
| 12          | mmu-let-7c                                         | mmu-let-7c              |
| 13          | mmu-miR-30a                                        | mmu-miR-30a             |
| 14          | mmu-miR-30d                                        | mmu-miR-99b             |
| 15          | mmu-miR-99b                                        | mmu-miR-30d             |
| 16          | mmu-miR-27b                                        | mmu-miR-27b             |
| 17          | mmu-miR-411                                        | mmu-miR-410             |
| 18          | mmu-miR-29a                                        | mmu-miR-16              |
| 19          | mmu-miR-16                                         | mmu-miR-143             |
| 20          | mmu-miR-30e                                        | mmu-miR-126-5p          |
| 21          | mmu-let-7a                                         | mmu-let-7i              |
| 22          | mmu-let-7i                                         | mmu-miR-29a             |
| 23          | mmu-miR-126-5p                                     | mmu-miR-181c            |
| 24          | mmu-miR-410                                        | mmu-miR-411             |
| 25          | mmu-miR-125a-5p                                    | mmu-let-7a              |
| 26          | mmu-miR-143                                        | mmu-miR-30e             |
|             |                                                    | mmu-miR-125a-           |
| 27          | mmu-miR-30c                                        | 5p                      |
| 28          | mmu-miR-181c                                       | mmu-miR-30c             |
| 29          | mmu-miR-486                                        | mmu-miR-486             |
| 30          | mmu-miR-3107                                       | mmu-miR-3107            |
| 31          | mmu-let-7g                                         | mmu-let-7g              |
| 32          | mmu-miR-136*                                       | mmu-miR-136*            |
| 33          | mmu-miR-181b                                       | mmu-miR-148a            |
| 34          | mmu-miR-151-5p                                     | mmu-miR-186             |
| 35          | mmu-miR-186                                        | mmu-miR-181b            |
| 36          | mmu-miR-541                                        | mmu-miR-151-3p          |
| 37          | mmu-miR-151-3p                                     | mmu-miR-103             |
| 38          | mmu-miR-148a                                       | mmu-miR-151-5p          |
| 39          | mmu-miR-103                                        | mmu-miR-132             |
| 40          | mmu-miR-138                                        | mmu-miR-138             |
| 41          | mmu-miR-381                                        | mmu-miR-541             |

|    |                       |                     |
|----|-----------------------|---------------------|
| 42 | <b>mmu-miR-132</b>    | <b>mmu-miR-381</b>  |
| 43 | <b>mmu-miR-204</b>    | <b>mmu-miR-204</b>  |
| 44 | <b>mmu-miR-218</b>    | <b>mmu-miR-100</b>  |
| 45 | <b>mmu-let-7d</b>     | <b>mmu-miR-26b</b>  |
| 46 | <b>mmu-let-7b</b>     | <b>mmu-miR-218</b>  |
| 47 | <b>mmu-miR-101a</b>   | <b>mmu-miR-101a</b> |
| 48 | <b>mmu-miR-338-3p</b> | <b>mmu-let-7d</b>   |
| 49 | <b>mmu-miR-153</b>    | <b>mmu-let-7b</b>   |
| 50 | <b>mmu-miR-300</b>    | <b>mmu-miR-92a</b>  |
| 51 | mmu-miR-100           | mmu-miR-99a         |
| 52 | mmu-miR-26b           | mmu-miR-338-3p      |
| 53 | mmu-miR-92a           | mmu-miR-153         |
| 54 | mmu-miR-222           | mmu-miR-300         |
| 55 | mmu-let-7e            | mmu-let-7e          |
| 56 | mmu-miR-99a           | mmu-miR-21          |
| 57 | mmu-miR-434-5p        | mmu-miR-328         |
| 58 | mmu-miR-21            | mmu-miR-192         |
| 59 | mmu-miR-192           | mmu-miR-378         |
| 60 | mmu-miR-328           | mmu-miR-222         |
| 61 | mmu-miR-221           | mmu-miR-434-5p      |
| 62 | mmu-miR-30b           | mmu-miR-30b         |
| 63 | mmu-miR-136           | mmu-miR-340-5p      |
| 64 | mmu-miR-378           | mmu-miR-744         |
| 65 | mmu-miR-744           | mmu-miR-221         |
| 66 | mmu-miR-340-5p        | mmu-miR-136         |
| 67 | mmu-miR-29c           | mmu-miR-146b        |
| 68 | mmu-miR-409-3p        | mmu-miR-148b        |
| 69 | mmu-miR-146b          | mmu-miR-150         |
| 70 | mmu-miR-126-3p        | mmu-miR-29c         |
| 71 | mmu-miR-301a          | mmu-miR-301a        |
| 72 | mmu-miR-148b          | mmu-miR-126-3p      |
| 73 | mmu-miR-150           | mmu-miR-409-3p      |
| 74 | mmu-miR-330           | mmu-miR-330         |
| 75 | mmu-miR-9*            | mmu-miR-181d        |
| 76 | mmu-miR-369-5p        | mmu-miR-98          |
| 77 | mmu-miR-98            | mmu-miR-9*          |
| 78 | mmu-miR-181d          | mmu-miR-24          |
| 79 | mmu-miR-23b           | mmu-miR-30e*        |
| 80 | mmu-miR-433           | mmu-miR-107         |
|    |                       | mmu-miR-1843b-5p    |
| 81 | mmu-miR-30e*          | 5p                  |
| 82 | mmu-miR-149           | mmu-miR-23b         |
| 83 | mmu-miR-24            | mmu-miR-149         |
| 84 | mmu-miR-342-3p        | mmu-miR-342-3p      |
| 85 | mmu-miR-1843b-5p      | mmu-miR-1843-5p     |
| 86 | mmu-miR-107           | mmu-miR-101b        |
| 87 | mmu-miR-181a-1*       | mmu-miR-139-5p      |
| 88 | mmu-miR-129-5p        | mmu-miR-369-5p      |
| 89 | mmu-miR-487b          | mmu-let-7d*         |
| 90 | mmu-miR-34c           | mmu-miR-129-5p      |

|     |                   |                   |
|-----|-------------------|-------------------|
| 91  | mmu-miR-125b-2-3p | mmu-miR-181a-1*   |
| 92  | mmu-miR-139-5p    | mmu-miR-433       |
|     |                   | mmu-miR-125b-2-3p |
| 93  | mmu-let-7d*       | 3p                |
| 94  | mmu-miR-3065      | mmu-miR-488       |
| 95  | mmu-miR-1843-5p   | mmu-miR-1839-5p   |
| 96  | mmu-miR-101b      | mmu-miR-487b      |
| 97  | mmu-miR-488       | mmu-miR-341       |
| 98  | mmu-miR-341       | mmu-miR-212-5p    |
|     |                   | mmu-miR-129-2-3p  |
| 99  | mmu-miR-344d      | 3p                |
| 100 | mmu-miR-384-5p    | mmu-miR-212-3p    |
| 101 | mmu-miR-129-2-3p  | mmu-miR-425       |
| 102 | mmu-miR-1839-5p   | mmu-miR-344d      |
| 103 | mmu-miR-425       | mmu-miR-3065      |
| 104 | mmu-miR-212-3p    | mmu-miR-25        |
| 105 | mmu-miR-212-5p    | mmu-miR-130a      |
| 106 | mmu-miR-708*      | mmu-miR-384-5p    |
| 107 | mmu-miR-376b*     | mmu-miR-30a*      |
| 108 | mmu-miR-380-3p    | mmu-miR-23a       |
| 109 | mmu-miR-30a*      | mmu-miR-708*      |
| 110 | mmu-miR-130a      | mmu-miR-195       |
| 111 | mmu-miR-872       | mmu-miR-1249      |
| 112 | mmu-miR-132*      | mmu-miR-34c       |
| 113 | mmu-miR-195       | mmu-miR-484       |
| 114 | mmu-miR-668       | mmu-miR-872       |
| 115 | mmu-miR-484       | mmu-miR-132*      |
| 116 | mmu-miR-1249      | mmu-miR-380-3p    |
| 117 | mmu-miR-25        | mmu-miR-335-3p    |
| 118 | mmu-miR-219-3p    | mmu-miR-668       |
| 119 | mmu-miR-335-3p    | mmu-miR-497       |
| 120 | mmu-miR-879       | mmu-miR-181c*     |
| 121 | mmu-miR-23a       | mmu-miR-532-5p    |
| 122 | mmu-miR-146a      | mmu-miR-376b*     |
| 123 | mmu-miR-361       | mmu-miR-879       |
| 124 | mmu-miR-497       | mmu-miR-361       |
| 125 | mmu-miR-181c*     | mmu-miR-598       |
| 126 | mmu-miR-29b       | mmu-miR-146a      |
| 127 | mmu-miR-532-5p    | mmu-miR-219-3p    |
| 128 | mmu-miR-667       | mmu-miR-421       |
| 129 | mmu-miR-421       | mmu-miR-140*      |
| 130 | mmu-miR-598       | mmu-miR-874       |
| 131 | mmu-miR-137       | mmu-miR-664       |
| 132 | mmu-miR-411*      | mmu-miR-667       |
| 133 | mmu-miR-128-1*    | mmu-miR-137       |
| 134 | mmu-miR-370       | mmu-miR-29b       |
| 135 | mmu-miR-673-5p    | mmu-miR-128-1*    |
| 136 | mmu-miR-872*      | mmu-miR-673-5p    |
| 137 | mmu-miR-15a       | mmu-miR-872*      |
| 138 | mmu-miR-874       | mmu-miR-676       |

|     |                   |                   |
|-----|-------------------|-------------------|
| 139 | mmu-miR-383       | mmu-miR-320       |
| 140 | mmu-miR-320       | mmu-miR-384-3p    |
| 141 | mmu-miR-671-3p    | mmu-miR-370       |
| 142 | mmu-miR-384-3p    | mmu-miR-15a       |
| 143 | mmu-miR-140*      | mmu-miR-671-3p    |
| 144 | mmu-miR-664       | mmu-miR-411*      |
| 145 | mmu-miR-676       | mmu-miR-666-5p    |
| 146 | mmu-miR-369-3p    | mmu-miR-326       |
| 147 | mmu-miR-335-5p    | mmu-miR-127*      |
| 148 | mmu-miR-127*      | mmu-miR-369-3p    |
| 149 | mmu-miR-298       | mmu-miR-335-5p    |
| 150 | mmu-miR-666-5p    | mmu-miR-383       |
| 151 | mmu-miR-485       | mmu-miR-330*      |
| 152 | mmu-miR-379       | mmu-miR-351       |
| 153 | mmu-miR-10a       | mmu-miR-485       |
| 154 | mmu-miR-3071*     | mmu-miR-423-5p    |
| 155 | mmu-miR-382       | mmu-miR-27a       |
| 156 | mmu-miR-330*      | mmu-miR-382       |
| 157 | mmu-miR-351       | mmu-miR-652       |
| 158 | mmu-miR-423-5p    | mmu-miR-10a       |
| 159 | mmu-miR-666-3p    | mmu-miR-298       |
| 160 | mmu-miR-708       | mmu-miR-495       |
| 161 | mmu-miR-495       | mmu-let-7b*       |
| 162 | mmu-let-7b*       | mmu-miR-708       |
| 163 | mmu-miR-93        | mmu-miR-379       |
| 164 | mmu-miR-27a       | mmu-miR-3071*     |
| 165 | mmu-miR-423-3p    | mmu-miR-93        |
| 166 | mmu-miR-125b-1-3p | mmu-miR-501-3p    |
| 167 | mmu-let-7c-2*     | mmu-miR-409-5p    |
|     |                   | mmu-miR-125b-1-3p |
| 168 | mmu-let-7a-1*     | mmu-miR-24-2*     |
| 169 | mmu-miR-652       | mmu-miR-423-3p    |
| 170 | mmu-miR-3475      | mmu-miR-666-3p    |
| 171 | mmu-miR-135a      | mmu-miR-331-3p    |
| 172 | mmu-miR-873       | mmu-miR-451       |
| 173 | mmu-miR-329*      | mmu-miR-3059      |
| 174 | mmu-miR-31        | mmu-miR-3475      |
| 175 | mmu-miR-409-5p    | mmu-miR-31        |
| 176 | mmu-miR-154       | mmu-miR-329*      |
| 177 | mmu-miR-501-3p    | mmu-let-7c-2*     |
| 178 | mmu-miR-323-3p    | mmu-let-7a-1*     |
| 179 | mmu-miR-3059      | mmu-miR-187       |
| 180 | mmu-miR-24-2*     | mmu-miR-3068*     |
| 181 | mmu-miR-194       | mmu-miR-145       |
| 182 | mmu-miR-326       | mmu-miR-323-3p    |
| 183 | mmu-miR-145       | mmu-miR-194       |
| 184 | mmu-miR-451       | mmu-miR-135a      |
| 185 | mmu-miR-3068*     | mmu-miR-154       |
| 186 | mmu-miR-338-5p    | mmu-miR-344       |
| 187 | mmu-miR-379*      |                   |

|     |                  |                  |
|-----|------------------|------------------|
| 188 | mmu-miR-7a       | mmu-miR-873      |
| 189 | mmu-miR-1198-5p  | mmu-miR-1198-5p  |
| 190 | mmu-miR-142-5p   | mmu-miR-338-5p   |
| 191 | mmu-miR-376a*    | mmu-miR-379*     |
| 192 | mmu-miR-187      | mmu-miR-376a*    |
| 193 | mmu-miR-331-3p   | mmu-miR-344b     |
| 194 | mmu-miR-1298*    | mmu-miR-142-5p   |
| 195 | mmu-miR-375      | mmu-miR-375      |
| 196 | mmu-miR-322      | mmu-miR-361*     |
| 197 | mmu-miR-1298     | mmu-miR-322      |
| 198 | mmu-miR-361*     | mmu-miR-488*     |
| 199 | mmu-miR-344      | mmu-miR-1298*    |
| 200 | mmu-miR-551b     | mmu-miR-185      |
| 201 | mmu-miR-431*     | mmu-miR-203      |
| 202 | mmu-miR-344b     | mmu-miR-431*     |
|     |                  | mmu-miR-129-1-3p |
| 203 | mmu-miR-673-3p   | 3p               |
| 204 | mmu-miR-185      | mmu-miR-676*     |
| 205 | mmu-miR-30d*     | mmu-miR-30d*     |
| 206 | mmu-miR-429      | mmu-miR-324-5p   |
| 207 | mmu-miR-676*     | mmu-miR-7a       |
| 208 | mmu-miR-221*     | mmu-miR-673-3p   |
| 209 | mmu-miR-28       | mmu-miR-28       |
| 210 | mmu-miR-488*     | mmu-miR-199a-3p  |
| 211 | mmu-miR-873*     | mmu-miR-199b     |
| 212 | mmu-miR-543      | mmu-miR-1298     |
| 213 | mmu-miR-129-1-3p | mmu-miR-221*     |
| 214 | mmu-miR-324-5p   | mmu-miR-5117     |
| 215 | mmu-miR-490-3p   | mmu-miR-152      |
| 216 | mmu-miR-5117     | mmu-miR-543      |
| 217 | mmu-miR-592      | mmu-let-7f-2*    |
| 218 | mmu-miR-376b     | mmu-miR-551b     |
| 219 | mmu-miR-346      | mmu-miR-346      |
| 220 | mmu-let-7f-2*    | mmu-miR-133a     |
| 221 | mmu-miR-34a      | mmu-miR-3102     |
| 222 | mmu-miR-3102     | mmu-miR-490-3p   |
| 223 | mmu-miR-431      | mmu-miR-30c-2*   |
| 224 | mmu-miR-329      | mmu-miR-873*     |
| 225 | mmu-miR-376a     | mmu-miR-329      |
| 226 | mmu-miR-133a     | mmu-miR-592      |
| 227 | mmu-miR-340-3p   | mmu-miR-429      |
| 228 | mmu-let-7e*      | mmu-let-7e*      |
| 229 | mmu-miR-485*     | mmu-miR-3085-3p  |
| 230 | mmu-miR-30c-2*   | mmu-miR-30c-1*   |
| 231 | mmu-miR-152      | mmu-miR-431      |
| 232 | mmu-miR-134      | mmu-miR-345-5p   |
| 233 | mmu-miR-30c-1*   | mmu-miR-376b     |
| 234 | mmu-miR-199a-3p  | mmu-miR-1839-3p  |
| 235 | mmu-miR-199b     | mmu-miR-485*     |
| 236 | mmu-miR-203      | mmu-miR-340-3p   |

|     |                   |                   |
|-----|-------------------|-------------------|
| 237 | mmu-miR-674*      | mmu-miR-674*      |
| 238 | mmu-miR-200b      | mmu-miR-134       |
| 239 | mmu-miR-582-5p    | mmu-miR-148a*     |
| 240 | mmu-miR-19b       | mmu-miR-1981*     |
| 241 | mmu-miR-3085-3p   | mmu-miR-34a       |
| 242 | mmu-miR-7a-1*     | mmu-miR-19b       |
| 243 | mmu-miR-1981*     | mmu-miR-582-5p    |
| 244 | mmu-miR-182       | mmu-miR-7a-1*     |
| 245 | mmu-miR-148a*     | mmu-miR-877*      |
| 246 | mmu-miR-7b        | mmu-miR-10b       |
| 247 | mmu-miR-674       | mmu-miR-702       |
| 248 | mmu-miR-877*      | mmu-miR-193b      |
| 249 | mmu-miR-1839-3p   | mmu-miR-365       |
| 250 | mmu-miR-98*       | mmu-miR-124*      |
| 251 | mmu-miR-99a*      | mmu-miR-148b*     |
| 252 | mmu-miR-190       | mmu-miR-98*       |
| 253 | mmu-miR-124*      | mmu-miR-190       |
| 254 | mmu-miR-433*      | mmu-miR-376a      |
| 255 | mmu-miR-148b*     | mmu-miR-99a*      |
| 256 | mmu-miR-3102-3p.2 | mmu-miR-664*      |
| 257 | mmu-miR-702       | mmu-miR-210       |
| 258 | mmu-miR-2182      | mmu-miR-674       |
| 259 | mmu-miR-27b*      | mmu-miR-200b      |
|     |                   | mmu-miR-3102-3p.2 |
| 260 | mmu-miR-29a*      | mmu-miR-27b*      |
| 261 | mmu-miR-365       | mmu-miR-7b        |
| 262 | mmu-miR-140       | mmu-miR-874*      |
| 263 | mmu-miR-874*      | mmu-miR-140       |
| 264 | mmu-miR-3099      | mmu-miR-133b      |
| 265 | mmu-miR-1224      | mmu-miR-182       |
| 266 | mmu-miR-200a      | mmu-miR-770-5p    |
| 267 | mmu-miR-193b      | mmu-miR-433*      |
| 268 | mmu-miR-345-5p    | mmu-miR-2182      |
| 269 | mmu-miR-133b      | mmu-miR-29a*      |
| 270 | mmu-miR-744*      | mmu-miR-22*       |
| 271 | mmu-miR-3078      | mmu-miR-3099      |
| 272 | mmu-miR-210       | mmu-miR-1224      |
| 273 | mmu-miR-664*      | mmu-miR-106b      |
| 274 | mmu-miR-1247      | mmu-miR-744*      |
| 275 | mmu-miR-106b      | mmu-miR-7a-2*     |
| 276 | mmu-miR-101a*     | mmu-miR-145*      |
| 277 | mmu-miR-770-5p    | mmu-miR-677       |
| 278 | mmu-miR-7a-2*     | mmu-miR-770-3p    |
| 279 | mmu-miR-22*       | mmu-miR-101a*     |
| 280 | mmu-miR-770-3p    | mmu-miR-3078      |
| 281 | mmu-miR-145*      | mmu-miR-99b*      |
| 282 | mmu-miR-376c      | mmu-miR-191*      |
| 283 | mmu-miR-377*      | mmu-miR-377*      |
| 284 | mmu-miR-191*      | mmu-miR-672       |
| 285 | mmu-miR-219-5p    |                   |



|     |                 |                 |
|-----|-----------------|-----------------|
| 286 | mmu-miR-677     | mmu-miR-28*     |
| 287 | mmu-miR-130b    | mmu-miR-1247    |
| 288 | mmu-miR-672     | mmu-miR-376c    |
| 289 | mmu-miR-425*    | mmu-miR-17      |
| 290 | mmu-miR-17      | mmu-miR-130b    |
| 291 | mmu-miR-671-5p  | mmu-miR-200a    |
| 292 | mmu-miR-28*     | mmu-miR-532-3p  |
| 293 | mmu-miR-342-5p  | mmu-miR-3082-3p |
| 294 | mmu-miR-99b*    | mmu-miR-1843-3p |
| 295 | mmu-miR-15b     | mmu-miR-152*    |
| 296 | mmu-miR-532-3p  | mmu-miR-425*    |
| 297 | mmu-miR-325     | mmu-miR-374     |
| 298 | mmu-miR-296-5p  | mmu-let-7i*     |
| 299 | mmu-miR-3082-3p | mmu-miR-342-5p  |
| 300 | mmu-miR-10b     | mmu-miR-29c*    |
| 301 | mmu-miR-700*    | mmu-miR-195*    |
| 302 | mmu-miR-764-3p  | mmu-miR-15b     |
| 303 | mmu-miR-20a     | mmu-miR-339-3p  |
| 304 | mmu-miR-574-3p  | mmu-miR-700*    |
| 305 | mmu-miR-195*    | mmu-miR-1983    |
| 306 | mmu-miR-374     | mmu-miR-455     |
| 307 | mmu-miR-1843-3p | mmu-let-7f-1*   |
| 308 | mmu-miR-222*    | mmu-miR-296-5p  |
| 309 | mmu-miR-29c*    | mmu-miR-671-5p  |
| 310 | mmu-miR-301b    | mmu-miR-500     |
| 311 | mmu-miR-500     | mmu-miR-574-3p  |
| 312 | mmu-miR-3093-5p | mmu-miR-301b    |
| 313 | mmu-miR-34b-3p  | mmu-miR-222*    |
| 314 | mmu-miR-1983    | mmu-miR-3057-5p |
| 315 | mmu-let-7g*     | mmu-miR-3093-5p |
| 316 | mmu-miR-138-1*  | mmu-miR-378*    |
| 317 | mmu-miR-1981    | mmu-miR-325     |
| 318 | mmu-miR-3061-3p | mmu-miR-3061-3p |
| 319 | mmu-let-7f-1*   | mmu-miR-322*    |
| 320 | mmu-miR-34b-5p  | mmu-miR-20a     |
| 321 | mmu-miR-130b*   | mmu-miR-3084    |
| 322 | mmu-miR-322*    | mmu-miR-1981    |
| 323 | mmu-let-7i*     | mmu-let-7g*     |
| 324 | mmu-miR-299*    | mmu-miR-106b*   |
| 325 | mmu-miR-106b*   | mmu-miR-1224*   |
| 326 | mmu-miR-339-3p  | mmu-miR-138-1*  |
| 327 | mmu-miR-1224*   | mmu-miR-130b*   |
| 328 | mmu-miR-378*    | mmu-miR-3068    |
| 329 | mmu-miR-344d-3* | mmu-miR-219-5p  |
| 330 | mmu-miR-3068    | mmu-miR-125a-3p |
| 331 | mmu-miR-496     | mmu-miR-299*    |
| 332 | mmu-miR-218-2*  | mmu-miR-764-3p  |
| 333 | mmu-miR-3084    | mmu-miR-24-1*   |
| 334 | mmu-miR-152*    | mmu-miR-34b-3p  |
| 335 | mmu-miR-135b    | mmu-miR-337-3p  |

|     |                  |                  |
|-----|------------------|------------------|
| 336 | mmu-miR-125a-3p  | mmu-miR-218-2*   |
| 337 | mmu-miR-337-3p   | mmu-miR-128-2*   |
| 338 | mmu-miR-299      | mmu-miR-299      |
| 339 | mmu-miR-3057-5p  | mmu-miR-496      |
| 340 | mmu-miR-128-2*   | mmu-miR-26b*     |
| 341 | mmu-miR-26b*     | mmu-miR-344c     |
| 342 | mmu-miR-543*     | mmu-miR-144*     |
| 343 | mmu-miR-879*     | mmu-miR-1947     |
| 344 | mmu-miR-377      | mmu-miR-879*     |
| 345 | mmu-miR-144*     | mmu-miR-344d-3*  |
| 346 | mmu-miR-24-1*    | mmu-miR-3083     |
| 347 | mmu-miR-3083     | mmu-miR-339-5p   |
| 348 | mmu-miR-344c     | mmu-miR-350      |
| 349 | mmu-miR-350      | mmu-miR-504      |
| 350 | mmu-miR-218-1*   | mmu-miR-188-5p   |
| 351 | mmu-miR-135a-2*  | mmu-miR-377      |
|     |                  | mmu-miR-3096b-5p |
| 352 | mmu-miR-188-5p   | mmu-miR-138-2*   |
| 353 | mmu-miR-455      | mmu-miR-323-5p   |
| 354 | mmu-miR-339-5p   | mmu-miR-543*     |
| 355 | mmu-miR-323-5p   | mmu-miR-30b*     |
| 356 | mmu-miR-138-2*   | mmu-miR-218-1*   |
| 357 | mmu-miR-30b*     | mmu-miR-135a-2*  |
| 358 | mmu-miR-183      | mmu-miR-34b-5p   |
| 359 | mmu-miR-504      | mmu-miR-210*     |
| 360 | mmu-miR-1947     | mmu-miR-539-5p   |
| 361 | mmu-miR-21*      | mmu-miR-135b     |
| 362 | mmu-miR-3096b-5p | mmu-miR-139-3p   |
| 363 | mmu-miR-139-3p   | mmu-miR-183      |
| 364 | mmu-miR-539-5p   | mmu-miR-21*      |
| 365 | mmu-miR-210*     | mmu-miR-184      |
| 366 | mmu-miR-679-5p   | mmu-miR-486*     |
| 367 | mmu-miR-184      | mmu-miR-455*     |
| 368 | mmu-miR-1264-3p  | mmu-miR-380-5p   |
| 369 | mmu-miR-3087     | mmu-miR-362-3p   |
| 370 | mmu-miR-93*      | mmu-miR-345-3p   |
| 371 | mmu-miR-455*     | mmu-let-7c-1*    |
| 372 | mmu-miR-34c*     | mmu-miR-3060     |
| 373 | mmu-miR-325*     | mmu-miR-199a-5p  |
| 374 | mmu-miR-380-5p   | mmu-miR-93*      |
| 375 | mmu-miR-362-3p   | mmu-miR-1943     |
| 376 | mmu-miR-450b-5p  | mmu-miR-142-3p   |
| 377 | mmu-let-7c-1*    | mmu-miR-325*     |
| 378 | mmu-miR-1943     | mmu-miR-679-5p   |
| 379 | mmu-miR-193      | mmu-miR-450b-5p  |
| 380 | mmu-miR-3060     | mmu-miR-193      |
| 381 | mmu-miR-33       | mmu-miR-3087     |
| 382 | mmu-miR-3072     | mmu-miR-467a     |
| 383 | mmu-miR-450a     | mmu-miR-26a-2*   |
| 384 | mmu-miR-345-3p   |                  |

|     |                   |                 |
|-----|-------------------|-----------------|
| 385 | mmu-miR-669c      | mmu-miR-3072    |
| 386 | mmu-miR-491       | mmu-miR-1264-3p |
| 387 | mmu-miR-142-3p    | mmu-miR-34c*    |
| 388 | mmu-miR-700       | mmu-miR-700     |
| 389 | mmu-miR-448-3p    | mmu-miR-448-3p  |
| 390 | mmu-miR-486*      | mmu-miR-1964-3p |
| 391 | mmu-miR-300*      | mmu-miR-491     |
| 392 | mmu-miR-1964-3p   | mmu-miR-7b*     |
| 393 | mmu-miR-544-3p    | mmu-miR-450a    |
| 394 | mmu-miR-467a      | mmu-miR-669c    |
| 395 | mmu-miR-185*      | mmu-miR-215     |
| 396 | mmu-miR-32        | mmu-miR-32      |
| 397 | mmu-miR-26a-2*    | mmu-miR-33      |
| 398 | mmu-miR-412-5p    | mmu-miR-412-5p  |
| 399 | mmu-miR-582-3p    | mmu-miR-300*    |
| 400 | mmu-miR-7b*       | mmu-miR-185*    |
| 401 | mmu-miR-542-3p    | mmu-miR-3061-5p |
| 402 | mmu-miR-33*       | mmu-miR-544-3p  |
| 403 | mmu-miR-154*      | mmu-miR-1982.1  |
| 404 | mmu-miR-667*      | mmu-miR-542-3p  |
| 405 | mmu-miR-3061-5p   | mmu-miR-582-3p  |
| 406 | mmu-miR-1982.1    | mmu-miR-3074-5p |
| 407 | mmu-miR-199a-5p   | mmu-miR-31*     |
| 408 | mmu-miR-540-5p    | mmu-miR-219-3p* |
| 409 | mmu-miR-3069-3p   | mmu-miR-33*     |
| 410 | mmu-miR-215       | mmu-miR-154*    |
| 411 | mmu-miR-17*       | mmu-miR-667*    |
| 412 | mmu-miR-3074-5p   | mmu-miR-540-5p  |
| 413 | mmu-miR-1197      | mmu-miR-3069-5p |
| 414 | mmu-miR-296-3p    | mmu-miR-331-5p  |
| 415 | mmu-miR-1193-3p   | mmu-miR-1193-3p |
| 416 | mmu-miR-107*      | mmu-miR-3069-3p |
| 417 | mmu-miR-19a       | mmu-miR-17*     |
| 418 | mmu-miR-219-3p*   | mmu-miR-211     |
| 419 | mmu-miR-92a-1*    | mmu-miR-1197    |
| 420 | mmu-miR-211       | mmu-miR-92a-1*  |
| 421 | mmu-miR-539-3p    | mmu-let-7a-2*   |
| 422 | mmu-miR-1a        | mmu-miR-29b-1*  |
|     |                   | mmu-miR-3074-1- |
| 423 | mmu-miR-337-5p    | 3p              |
| 424 | mmu-miR-29b-1*    | mmu-miR-19a     |
| 425 | mmu-miR-362-5p    | mmu-miR-449a    |
| 426 | mmu-miR-29b-2*    | mmu-miR-362-5p  |
| 427 | mmu-miR-3074-1-3p | mmu-miR-141     |
| 428 | mmu-miR-1b-5p     | mmu-miR-1a      |
| 429 | mmu-miR-551b*     | mmu-miR-187*    |
| 430 | mmu-miR-544-5p    | mmu-miR-296-3p  |
| 431 | mmu-miR-155       | mmu-miR-27a*    |
| 432 | mmu-miR-494       | mmu-miR-1b-5p   |
| 433 | mmu-miR-672*      | mmu-miR-107*    |

|     |                 |                 |
|-----|-----------------|-----------------|
| 434 | mmu-miR-467e    | mmu-miR-3093-3p |
| 435 | mmu-miR-3069-5p | mmu-miR-491*    |
| 436 | mmu-miR-31*     | mmu-miR-186*    |
| 437 | mmu-miR-100*    | mmu-miR-155     |
| 438 | mmu-miR-188-3p  | mmu-miR-467e    |
| 439 | mmu-miR-505-3p  | mmu-miR-670*    |
| 440 | mmu-miR-331-5p  | mmu-miR-337-5p  |
| 441 | mmu-miR-449a    | mmu-miR-208b    |
| 442 | mmu-miR-186*    | mmu-miR-16-1*   |
| 443 | mmu-miR-190*    | mmu-miR-672*    |
| 444 | mmu-let-7a-2*   | mmu-miR-100*    |
| 445 | mmu-miR-92b*    | mmu-miR-3077    |
| 446 | mmu-miR-467d    | mmu-miR-381*    |
| 447 | mmu-miR-3093-3p | mmu-miR-551b*   |
| 448 | mmu-miR-3077    | mmu-miR-505-3p  |
| 449 | mmu-miR-669a-3p | mmu-miR-92b*    |
| 450 | mmu-miR-669o-3p | mmu-miR-669a-3p |
| 451 | mmu-miR-1948    | mmu-miR-669o-3p |
| 452 | mmu-miR-505-5p  | mmu-miR-3084*   |
| 453 | mmu-miR-15b*    | mmu-miR-505-5p  |
| 454 | mmu-miR-3071    | mmu-miR-544-5p  |
| 455 | mmu-miR-381*    | mmu-miR-494     |
| 456 | mmu-miR-27a*    | mmu-miR-1948    |
| 457 | mmu-miR-25*     | mmu-miR-1982.2  |
| 458 | mmu-miR-137*    | mmu-miR-190*    |
| 459 | mmu-miR-448-5p  | mmu-miR-188-3p  |
| 460 | mmu-miR-3084*   | mmu-miR-690     |
| 461 | mmu-miR-466p-3p | mmu-miR-143*    |
| 462 | mmu-miR-466b-3p | mmu-miR-137*    |
| 463 | mmu-miR-466c-3p | mmu-miR-1251    |
| 464 | mmu-miR-187*    | mmu-miR-539-3p  |
| 465 | mmu-miR-670*    | mmu-miR-190b    |
| 466 | mmu-miR-190b    | mmu-miR-15b*    |
| 467 | mmu-miR-141     | mmu-miR-467d    |
| 468 | mmu-miR-690     | mmu-miR-223     |
| 469 | mmu-miR-1251    | mmu-miR-29b-2*  |
| 470 | mmu-miR-3572    | mmu-miR-3071    |
| 471 | mmu-miR-208b    | mmu-miR-3572    |
| 472 | mmu-miR-16-1*   | mmu-miR-3103    |
| 473 | mmu-miR-466a-3p | mmu-miR-421*    |
| 474 | mmu-miR-466e-3p | mmu-miR-487b*   |
| 475 | mmu-miR-574-5p  | mmu-miR-204*    |
| 476 | mmu-miR-1982.2  | mmu-miR-25*     |
| 477 | mmu-miR-223     | mmu-miR-26a-1*  |
| 478 | mmu-miR-150*    | mmu-miR-344f-3p |
| 479 | mmu-miR-421*    | mmu-miR-466p-3p |
| 480 | mmu-miR-1264-5p | mmu-miR-466b-3p |
| 481 | mmu-miR-487b*   | mmu-miR-466c-3p |
|     |                 | mmu-miR-3102-   |
| 482 | mmu-miR-3076-3p | 5p.2            |

|     |                   |                 |
|-----|-------------------|-----------------|
| 483 | mmu-miR-499       | mmu-miR-18a*    |
| 484 | mmu-miR-143*      | mmu-miR-150*    |
| 485 | mmu-miR-18a*      | mmu-miR-410*    |
| 486 | mmu-miR-344f-3p   | mmu-miR-466a-3p |
| 487 | mmu-miR-18a       | mmu-miR-466e-3p |
| 488 | mmu-miR-26a-1*    | mmu-miR-448-5p  |
| 489 | mmu-miR-3102-5p.2 | mmu-miR-1264-5p |
| 490 | mmu-miR-3103      | mmu-miR-301a*   |
| 491 | mmu-miR-410*      | mmu-miR-3076-3p |
| 492 | mmu-miR-301a*     | mmu-miR-574-5p  |
| 493 | mmu-miR-495*      | mmu-miR-499     |
| 494 | mmu-miR-491*      | mmu-miR-495*    |
| 495 | mmu-miR-204*      | mmu-miR-18a     |

**Table S5: Primers used in the study**

| <b>Name</b>            | <b>Target</b>                                | <b>Forward primer (5'-&gt;3')</b> | <b>Reverse primer (5'-&gt;3')</b> |
|------------------------|----------------------------------------------|-----------------------------------|-----------------------------------|
| <i>Kat2a</i>           | mRNA                                         | GAAGAGGACCCTCATCCTCA              | GGAGAATTTGCCCGTAGAT               |
| <i>Htr1a</i>           | mRNA                                         | CCCCTTCAGCTGTATCTTTCC             | AAAATGCAGCACGGGTTTT               |
| <i>Htr1b</i>           | mRNA                                         | GTCCTGCTGGTTGCTTTGTT              | TCCGATACACCGTAGCGATT              |
| <i>Htr2a</i>           | mRNA                                         | CTGCTGGGTTTCCTTGTCAT              | GTAAATCCAGACGGCACAGAG             |
| <i>Htr2c</i>           | mRNA                                         | TGCTTAAAAGTGAAGCAATAATGG          | AGGCCAATTAGGTGCACAAG              |
| <i>Hcrtr2</i>          | mRNA                                         | GCTCACCAGCATAAGCACAC              | GGTACTCCCTGCTGTAGATACCA           |
| <i>Penk</i>            | mRNA                                         | CCCAGGCGACATCAATTT                | TCTCCCAGATTTTGAAAGAAGG            |
| <i>Npbwr1</i>          | mRNA                                         | TCGTCTACGGGGTAATTTGC              | GTACGTACAGCACCGCAGAG              |
| <i>Hprt</i>            | mRNA Reference                               | TCCTCCTCAGACCGCTTTT               | CCTGGTTCATCATCGCTAATC             |
| <i>Hcrtr2</i> promoter | ChIP DNA,<br>predicted NFκB-<br>binding site | GCTCTTAGGCAGCTTCTCC               | CAATGCCTCCAGAGCCTTG               |
| <i>Npbwr1</i> promoter | ChIP DNA,<br>predicted NFκB-<br>binding site | TTCCTCCCTGACCTCCCC                | TTACCTGGCGAGTCCCAGC               |

**Table S6 Edited variant frequency of Htr2c mRNA.**

Comparison to published dataset using 454 pyrosequencing (significant changes in *Kat2a* cKO mice are marked in bold, increased:red; decreased:blue)

| Rank | Average relative occurrence in control CA1 | Edited sites / Isoform | Sequence of edited cassette as seen in RNA-seq data | Edited protein sequence | Average relative occurrence in hypothalamus (Schellekens et al.,2012) |
|------|--------------------------------------------|------------------------|-----------------------------------------------------|-------------------------|-----------------------------------------------------------------------|
| 1    | 41.51%                                     | ABD                    | GTGCGTAATCCTG                                       | VNV                     | 33.58%                                                                |
| 2    | <b>10.60%</b>                              | <b>ABCD</b>            | <b>GTGCGTAGTCCTG</b>                                | <b>VSV</b>              | 11.32%                                                                |
| 3    | <b>10.50%</b>                              | <b>AB</b>              | <b>GTGCGTAATCCTA</b>                                | <b>VNI</b>              | 19.31%                                                                |
| 4    | 8.25%                                      | (unedited)             | ATACGTAATCCTA                                       | INI                     | 6.24%                                                                 |
| 5    | 7.19%                                      | A                      | GTACGTAATCCTA                                       | VNI                     | 8.68%                                                                 |
| 6    | 5.63%                                      | ABC                    | GTGCGTAGTCCTA                                       | VSI                     | 8.82%                                                                 |
| 7    | <b>4.44%</b>                               | <b>D</b>               | <b>ATACGTAATCCTG</b>                                | <b>INV</b>              | 2.66%                                                                 |
| 8    | 2.10%                                      | AD                     | GTACGTAATCCTG                                       | VNV                     | <1%                                                                   |
| 9    | 1.49%                                      | AC                     | GTACGTAGTCCTA                                       | VSI                     | 1.11%                                                                 |
| 10   | 1.23%                                      | ACD                    | GTACGTAGTCCTG                                       | VSV                     | <1%                                                                   |
| 11   | <1%                                        | AE                     | GTACGTGATCCTA                                       | VDI                     | <1%                                                                   |
| 11   | <1%                                        | C                      | ATACGTAGTCCTA                                       | ISI                     | <1%                                                                   |
| 11   | <1%                                        | DE                     | ATACGTGATCCTG                                       | IDV                     | <1%                                                                   |
| 11   | <1%                                        | ABCDE                  | GTGCGTGGTCCTG                                       | VGW                     | <1%                                                                   |
| 11   | <1%                                        | ABCE                   | GTGCGTGGTCCTA                                       | VDV                     | <1%                                                                   |
| 11   | <1%                                        | ABDE                   | GTGCGTAGTCCTG                                       | VDV                     | <1%                                                                   |
| 11   | <1%                                        | ABE                    | GTGCGTAGTCCTA                                       | VDI                     | <1%                                                                   |
| 11   | <1%                                        | ACDE                   | GTGCGTGGTCCTA                                       | VGW                     | <1%                                                                   |
| 11   | <1%                                        | ACE                    | GTACGTGGTCCTA                                       | VGI                     | <1%                                                                   |
| 11   | <1%                                        | ADE                    | GTACGTGATCCTG                                       | VDV                     | <1%                                                                   |
| 11   | <1%                                        | B                      | ATGCGTAATCCTA                                       | MNI                     | <1%                                                                   |
| 11   | <1%                                        | BC                     | ATGCGTAGTCCTA                                       | MSI                     | <1%                                                                   |
| 11   | <1%                                        | BCD                    | ATGCGTAGTCCTG                                       | MSV                     | <1%                                                                   |
| 11   | <1%                                        | BCDE                   | ATGCGTGGTCCTG                                       | MGV                     | <1%                                                                   |
| 11   | <1%                                        | BD                     | ATGCGTAATCCTG                                       | MNV                     | <1%                                                                   |
| 11   | <1%                                        | BDE                    | ATGCGTAGTCCTG                                       | MDV                     | <1%                                                                   |
| 11   | <1%                                        | BE                     | ATGCGTAGTCCTA                                       | MDI                     | <1%                                                                   |
| 11   | <1%                                        | BCE                    | ATGCGTGGTCCTA                                       | MGI                     | <1%                                                                   |
| 11   | <1%                                        | CD                     | ATACGTAGTCCTG                                       | ISV                     | <1%                                                                   |
| 11   | <1%                                        | CDE                    | ATACGTGGTCCTG                                       | IGV                     | <1%                                                                   |
| 11   | <1%                                        | CE                     | ATACGTGGTCCTA                                       | IGI                     | <1%                                                                   |
| 11   | <1%                                        | E                      | ATACGTGATCCTA                                       | IDI                     | <1%                                                                   |
